# 1 Pathogenic variants of sphingomyelin synthase SMS2 disrupt lipid 2 landscapes in the secretory pathway

3

4

## 5 **Authors:**

6 Tolulope Sokoya<sup>1\*</sup>, Jan Parolek<sup>1\*</sup>, Mads Møller Foged<sup>2</sup>, Dmytro I. Danylchuk<sup>3</sup>, Manuel Bozan<sup>1</sup>,  
7 Bingshati Sarkar<sup>1</sup>, Angelika Hilderink<sup>1</sup>, Michael Philippi<sup>4</sup>, Lorenzo D. Botto<sup>5</sup>, Paulien A. Terhal<sup>6</sup>, Outi  
8 Mäkitie<sup>7</sup>, Jacob Piehler<sup>4</sup>, Yeongho Kim<sup>8</sup>, Christopher G. Burd<sup>8</sup>, Andrey S. Klymchenko<sup>3</sup>, Kenji Maeda<sup>2</sup>,  
9 Joost C. M. Holthuis<sup>1‡</sup>

10

11

## 12 **Affiliations:**

13 <sup>1</sup>Molecular Cell Biology Division, Department of Biology and Center of Cellular Nanoanalytics,  
14 Osnabrück University, 49076 Osnabrück, Germany

15 <sup>2</sup>Cell Death and Metabolism Group, Center for Autophagy, Recycling and Disease, Danish Cancer  
16 Society Research Center, DK-2100 Copenhagen, Denmark

17 <sup>3</sup>Laboratoire de Bioimagerie et Pathologies, UMR 7021 CNRS, Université de Strasbourg, 67410  
18 Illkirch, France

19 <sup>4</sup>Biophysics Division, Department of Biology and Center of Cellular Nanoanalytics, Osnabrück  
20 University, 49076 Osnabrück, Germany

21 <sup>5</sup>Division of Medical Genetics, Department of Pediatrics, University of Utah, Salt Lake City, Utah, USA

22 <sup>6</sup>Department of Genetics, University Medical Center Utrecht, Utrecht, Netherlands

23 <sup>7</sup>Children's Hospital, University of Helsinki and Helsinki University Hospital, Helsinki, Finland

24 <sup>8</sup>Department of Cell Biology, Yale School of Medicine, New Haven, CT 06520, USA

25

26

27 \*These authors contributed equally

28

29 ‡Corresponding author: [holthuis@uos.de](mailto:holthuis@uos.de)

30

31

## 32 **Short title:**

33 Pathogenic SMS2 affects organellar lipid codes

34

## 35 **Key words:**

36 Lipid order probes; organellar lipidomics; osteoporosis; sphingomyelin biosensor; transbilayer lipid  
37 asymmetry

38

39 **ABSTRACT**

40

41 Sphingomyelin is a dominant sphingolipid in mammalian cells. Its production in the *trans*-Golgi traps  
42 cholesterol synthesized in the ER to promote formation of a sphingomyelin/sterol gradient along the  
43 secretory pathway. This gradient marks a fundamental transition in physical membrane properties that  
44 help specify organelle identity and function. We previously identified mutations in sphingomyelin  
45 synthase SMS2 that cause osteoporosis and skeletal dysplasia. Here we show that SMS2 variants  
46 linked to the most severe bone phenotypes retain full enzymatic activity but fail to leave the ER owing  
47 to a defective autonomous ER export signal. Cells harboring pathogenic SMS2 variants accumulate  
48 sphingomyelin in the ER and display a disrupted transbilayer sphingomyelin asymmetry. These  
49 aberrant sphingomyelin distributions also occur in patient-derived fibroblasts and are accompanied by  
50 imbalances in cholesterol organization, glycerophospholipid profiles and lipid order in the secretory  
51 pathway. We postulate that pathogenic SMS2 variants undermine the capacity of osteogenic cells to  
52 uphold nonrandom lipid distributions that are critical for their bone forming activity.

53

## 54 INTRODUCTION

55

56 Eukaryotic membranes consist of complex lipid mixtures, with amounts and ratios of the individual  
57 lipids showing marked variations between organelles and membrane leaflets (van Meer et al., 2008;  
58 Harayama and Riezman, 2018). Whereas some rare lipids contribute to organelle function by allowing  
59 stereospecific recognition through lipid binding proteins (Di Paolo and De Camilli, 2006), numerous  
60 recognition processes on or within organellar bilayers are determined by biophysical membrane  
61 properties that result from the collective behavior of the bulk lipids. Particularly striking are the lipid-  
62 induced changes in bilayer-thickness, lipid packing density and surface charge that accompany the  
63 transition from early to late organelles in the secretory pathway (Sharpe et al., 2010; Bigay and  
64 Antonny, 2012; Holthuis and Menon, 2014). These changes are highly conserved and provide specific  
65 cues for membrane proteins that govern vital processes such as protein secretion and signaling  
66 (Bigay and Antonny, 2012; Magdeleine et al., 2016; Zhou and Hancock, 2018). To defend the unique  
67 lipid mixtures of secretory organelles against erosion by vesicular transport, cells exploit cytosolic  
68 transfer proteins that enable specific lipids to bypass vesicular connections by mediating their  
69 monomeric exchange at contact sites between distinct organelles (Wong et al., 2019). Moreover,  
70 organelles like the ER harbor membrane property sensors that provide feedback to the lipid metabolic  
71 network to preserve their characteristic lipid composition when exposed to stress or metabolic insults  
72 (Radanović et al., 2018; Levental et al., 2020).

73

74 Sterols and sphingomyelin (SM) are prime examples of bulk membrane lipids that are unevenly  
75 distributed between secretory organelles (van Meer et al., 2008). Sterols are rare in the ER but  
76 abundant in the *trans*-Golgi and plasma membrane (PM). The bulk of SM is synthesized in the lumen  
77 of the *trans*-Golgi from ceramides supplied by the ER and delivered by vesicular transport to the PM,  
78 where it accumulates in the exoplasmic leaflet (Hanada et al., 2003). SM is the preferred binding  
79 partner of cholesterol (Slotte, 2013). About one third of the total cholesterol pool in the PM is  
80 sequestered by SM (Das et al., 2014; Endapally et al., 2019). Besides influencing cellular cholesterol  
81 homeostasis, SM contributes to an enhanced packing density and thickening of *trans*-Golgi and PM  
82 bilayers. This, in turn, may modulate protein sorting by hydrophobic mismatching of membrane spans  
83 (Munro, 1995; Quiroga et al., 2013). Moreover, an asymmetric distribution of SM across late secretory  
84 and endolysosomal bilayers is relevant for an optimal repair of damaged organelles. Lysosome  
85 wounding by chemicals or bacterial toxins triggers a rapid Ca<sup>2+</sup>-activated scrambling and cytosolic  
86 exposure of SM (Ellison et al., 2020; Niekamp et al., 2022). Subsequent conversion of SM to  
87 ceramides by neutral SMases on the cytosolic surface of injured lysosomes promotes their repair,  
88 presumably by driving an inverse budding of the damaged membrane area in a process akin to  
89 ESCRT-mediated formation of intraluminal vesicles. This SM-based membrane restoration pathway  
90 functions independently of ESCRT and may also operate at the PM (Niekamp et al., 2022).

91

92 SM biosynthesis in mammals is mediated by SM synthase 1 (SMS1) and SMS2. Both enzymes act as  
93 phosphatidylcholine (PC):ceramide phosphocholine transferases, which catalyze the transfer of the

94 phosphorylcholine head group from PC onto ceramide to generate SM and diacylglycerol (DAG)  
95 (Huitema et al., 2004). SMS1 resides in the *trans*-Golgi, and its deficiency in mice causes  
96 mitochondrial dysfunction and disrupts insulin secretion (Yano et al., 2011, 2013). SMS2 resides both  
97 in the *trans*-Golgi and at the PM. Its deficiency ameliorates diet-induced obesity and insulin resistance  
98 (Li et al., 2011; Mitsutake et al., 2011; Sugimoto et al., 2016; Kim et al., 2018). Removal of SMS1 or  
99 SMS2 has only a minor impact on ceramide, DAG and SM pools in tissues or cells, and the  
100 mechanisms underlying the phenotypes observed in SMS1 and SMS2 knockout mice are not well  
101 understood. Besides SMS1 and SMS2, mammalian cells contain an ER-resident and SMS-related  
102 protein (SMSr), which displays phospholipase C activity and synthesizes trace amounts of the SM  
103 analog ceramide phosphoethanolamine (Vacaru et al., 2009; Murakami and Sakane, 2021).

104  
105 We previously reported that SMS2 is highly expressed in bone and identified heterozygous mutations  
106 in the SMS2-encoding gene (*SGMS2*) as the underlying cause of a clinically described autosomal  
107 dominant genetic disorder – osteoporosis with calvarial doughnut lesions (OP-CDL: OMIM #126550)  
108 (Pekkinen et al., 2019). The clinical presentations of OP-CDL range from childhood-onset  
109 osteoporosis with low bone mineral density, skeletal fragility and sclerotic doughnut-shaped lesions in  
110 the skull to a severe spondylometaphyseal dysplasia with neonatal fractures, long-bone deformities,  
111 and short stature. The milder phenotype is associated with the nonsense variant p.Arg50\*, which  
112 gives rise to a truncated but catalytically active enzyme that mislocalizes to the *cis/medial*-Golgi (T.  
113 Sokoya and J.C.M. Holthuis, unpublished). However, the most severe phenotypes are associated with  
114 two closely localized missense variants, p.Ile62Ser and p.Met64Arg. Interestingly, these missense  
115 variants enhance *de novo* SM biosynthesis by blocking ER export of enzymatically active SMS2  
116 (Pekkinen et al., 2019). This suggests that OP-CDL in patients with pathogenic SMS2 variants is not  
117 due to a reduced capacity to synthesize SM but rather a consequence of mistargeting bulk SM  
118 production to an early secretory organelle. How this affects the contrasting lipid landscapes and  
119 membrane properties in the secretory pathway remains to be established.

120  
121 In this work, we used genetically engineered cell lines and OP-CDL patient-derived fibroblasts to  
122 address the impact of pathogenic SMS2 variants p.Ile62Ser and p.Met64Arg on the lipid composition,  
123 transbilayer arrangement, and packing density of early and late secretory organelles. Toward this  
124 end, we combined shotgun lipidomics on purified organelles with the application of lipid biosensors  
125 and targeted solvatochromic fluorescent probes in live cells. We show that cells harbouring  
126 pathogenic SMS2 variants accumulate PM-like amounts of SM in the ER and display a disrupted  
127 transbilayer SM asymmetry. This is accompanied by significant imbalances in cholesterol organization  
128 and membrane lipid order. We also find that pathogenic SMS2 variants cause marked changes in the  
129 ER glycerophospholipid profile, including an enhanced phospholipid desaturation and rise in cone-  
130 shaped ethanolamine-containing phospholipids, potentially reflecting an adaptive cellular response to  
131 counteract SM-mediated rigidification of the ER bilayer. Our data indicate that pathogenic SMS2  
132 variants profoundly undermine the cellular capacity to uphold nonrandom lipid distributions in the  
133 secretory pathway that may be critical for the bone forming activity of osteogenic cells.

134 **RESULTS**

135

136 **The IXMP motif in SMS2 is part of an autonomous ER export signal**

137 The most severe clinical presentations of OP-CDL are associated with the SMS2 missense variants  
138 p.I62S and p.M64R, which cause retention of a functional enzyme in the ER (Pekkinen et al., 2019).  
139 Ile62 and Met64 are part of a conserved sequence motif, IXMP, which is located 13-14 residues  
140 upstream of the first membrane span in both SMS1 and SMS2 (**Fig. 1a, b**). We reasoned that this  
141 motif may be part of an ER export signal, which could explain its absence in the ER-resident SMS  
142 family member SMSr (Vacaru et al., 2009). To test this idea, we generated FLAG-tagged SMS2  
143 constructs in which Ile62 or Met64 was replaced with Ser or Arg, respectively. Upon their transfection  
144 in HeLa cells, the subcellular distribution of the SMS2 variants was determined by fluorescence  
145 microscopy using antibodies against the FLAG tag and ER-resident protein calnexin. In agreement  
146 with our previous findings (Pekkinen et al., 2019), SMS2<sup>I62S</sup> and SMS2<sup>M64R</sup> were each retained in the  
147 ER, in contrast to wildtype SMS2, which localized to the Golgi and PM (**Fig. 1c**). We then asked  
148 whether the IXMP motif in SMS2 can mediate ER export independently of other sorting information.  
149 To address this, we created a FLAG-tagged chimera protein, SMSr-SMS2<sub>11-77</sub>, in which the region  
150 linking the N-terminal SAM domain and first membrane span of SMSr was replaced with the IXMP-  
151 containing cytosolic tail of SMS2 (**Fig. 1a**). Contrary to SMSr, SMSr-SMS2<sub>11-77</sub> localized to the Golgi.  
152 However, SMSr-SMS2<sub>11-77</sub> variants in which Ile62 or Met64 was replaced with Ser or Arg,  
153 respectively, were retained in the ER (**Fig. 1d**). This indicates that the IXMP motif in SMS2 is part of  
154 an autonomous ER export signal.

155

156 **Pathogenic SMS2 variants mediate bulk production of SM in the ER**

157 Metabolic labeling of patient-derived fibroblasts with <sup>14</sup>C-choline showed that missense SMS2 variants  
158 p.I62S and p.M64R cause a marked increase in the rate of *de novo* SM biosynthesis (Pekkinen et al.,  
159 2019). To directly test the impact of these pathogenic mutations on the biosynthetic capacity of SMS2,  
160 we stably transduced SMS1/2 double knockout ( $\Delta$ SMS1/2) HeLa cells with doxycycline-inducible  
161 expression constructs encoding FLAG-tagged SMS2, SMS2<sup>I62S</sup>, SMS2<sup>M64R</sup> or their enzyme dead  
162 isoforms SMS2<sup>D276A</sup>, SMS2<sup>I62S/D276A</sup> and SMS2<sup>M64R/D276A</sup>, respectively. After treatment of cells with  
163 doxycycline for 16 h, SMS2 expression was verified by immunoblot analysis and fluorescence  
164 microscopy (**Fig. 2a and b; Fig. S1**). Next, control and doxycycline-treated cells were metabolically  
165 labelled with a clickable sphingosine analogue for 16 h, subjected to total lipid extraction, click reacted  
166 with the fluorogenic dye 3-azido-7-hydroxycoumarin, and analyzed by TLC. This revealed that  
167 doxycycline-induced expression of SMS2<sup>I62S</sup> and SMS2<sup>M64R</sup>, but not their enzyme-dead isoforms, fully  
168 restored SM biosynthesis in  $\Delta$ SMS1/2 cells (**Fig. 2c**).

169

170 Quantitative mass spectrometric analysis of total lipid extracts from wildtype and  $\Delta$ SMS1/2 cells  
171 revealed that removal of SMS1 and SMS2 wiped out the entire cellular SM pool and caused a four-  
172 fold increase in glycosphingolipid (GSL) levels, consistent with a competition between Golgi-resident  
173 SM and glucosylceramide (GlcCer) synthases for ceramide substrate (**Fig. 2d; Fig. S2**). In  $\Delta$ SMS1/2

174 cells transduced with pathogenic SMS2<sup>I62S</sup> or SMS2<sup>M64R</sup>, addition of doxycycline fully restored the SM  
175 pool. This was accompanied by a decrease in GSL levels. Doxycycline-induced expression of SMS2  
176 only partially restored the SM pool, presumably because SMS2, unlike its pathogenic isoforms, has  
177 no direct access to ER-derived ceramides and must compete with GlcCer synthase for ceramides  
178 delivered to the Golgi. Moreover,  $\Delta$ SMS1/2 cells expressing SMS2<sup>I62S</sup> or SMS2<sup>M64R</sup> contained 3- to 4-  
179 fold higher levels of dihydroceramide (Cer d18:0/16:0) and dihydroceramide-based SM (SM  
180 d18:0/16:0) than wildtype or SMS2-expressing  $\Delta$ SMS1/2 cells (**Fig. 2d; Fig. S2b**), which suggests  
181 that ER-resident pathogenic SMS2 variants compete with ceramide desaturase DES1 for  
182 dihydroceramide substrate synthesized in the ER. All together, these data indicate that pathogenic  
183 SMS2 variants support bulk production of SM in the ER.

184

### 185 **Lipidome analysis of ER and PM isolated from cells expressing pathogenic SMS2 variants**

186 We next asked whether pathogenic SMS2 variants that mediate bulk production of SM in the ER  
187 interfere with the ability of cells to generate a SM/cholesterol concentration gradient along the  
188 secretory pathway. To address this, we analyzed the lipid composition of ER and PM purified from  
189 wildtype or  $\Delta$ SMS1/2 cells that express either SMS2 or the pathogenic variant SMS2<sup>M64R</sup>. For  
190 purification of the ER, cells were lysed and a post-nuclear supernatant was incubated with an  
191 antibody against calnexin (**Fig. 3a**). This was followed by incubation with secondary antibody-  
192 conjugated paramagnetic microbeads. For PM isolation, the surface of cells was treated with a non-  
193 membrane permeant biotinylation reagent before cell lysis (**Fig. 4a**). A post-nuclear supernatant was  
194 then directly incubated with streptavidin-conjugated paramagnetic microbeads. The microbeads were  
195 applied to columns packed with ferromagnetic spheres ( $\mu$ MACS columns) and the bound material was  
196 eluted after the columns were thoroughly washed. The purity of isolated ER and PM was assessed by  
197 immunoblot and lipidome analysis.

198

199 As shown in **Fig. 3b**, ER eluates contained calnexin but were devoid of protein markers of the PM  
200 (Na/K-ATPase), lysosomes (LAMP1) or mitochondria (pMito60). As expected, ER eluates from cells  
201 expressing the pathogenic variant SMS2<sup>M64R</sup> contained readily detectable levels of the protein. In  
202 contrast, no traces of SMS2 were found in ER eluates from cells expressing the wildtype protein. As  
203 there is no specific lipid marker for the ER, using a lipidomics approach to confirm that pull-down with  
204 anti-calnexin antibody indeed isolates the ER is not trivial. However, the ER is known to synthesize  
205 ceramides whereas SM is primarily produced in the *trans*-Golgi and accumulates in the PM. In line  
206 with the immunoblot data, ER eluates from wildtype cells displayed a 5-fold higher ceramide/SM ratio  
207 than total cell lysates. Moreover, ER eluates were largely devoid of lipids that are normally  
208 concentrated in mitochondria (cardiolipin, CL), PM (SM, cholesterol) and lysosomes (bis(monoacyl-  
209 glycerol)phosphate, here quantified together with the isobaric phosphatidylglycerol and reported as  
210 BMP/PG; **Fig. 3c**). Immunoblot analysis of the PM eluates revealed that they contain Na/K-ATPase  
211 but lack protein markers of the ER (calnexin), lysosomes (LAMP1) and mitochondria (pMito60; **Fig.**  
212 **4b**). As expected, PM eluates from cells expressing wildtype SMS2 contained readily detectable  
213 amounts of the protein. On the other hand, PM eluates from  $\Delta$ SMS1/2 cells expressing the pathogenic

214 variant SMS2<sup>M64R</sup> were devoid of this protein. Moreover, lipidome analysis of PM eluates revealed  
215 significantly elevated levels of lipids that are typically concentrated in the PM (i.e. SM, cholesterol,  
216 PS) and a 5-fold reduction in the ceramide/SM ratio relative to total cell lysates (**Fig. 4c**). Lipids  
217 primarily associated with lysosomes and mitochondria (BMP/PG, CL) were largely absent.

218

### 219 **Cells expressing pathogenic SMS2 variants accumulate SM in the ER**

220 Using the pull-down approaches described above, we next determined the lipid composition of the ER  
221 and PM isolated from wildtype and  $\Delta$ SMS1/2 cells expressing SMS2 or SMS2<sup>M64R</sup>. The ER from  
222  $\Delta$ SMS1/2 cells expressing SMS2 had a lipid composition similar to that of the ER from wildtype cells.  
223 In contrast, the ER from SMS2<sup>M64R</sup>-expressing cells contained 7-fold higher SM levels, i.e. ~10 mol%  
224 SM instead of ~1.5 mol% of all identified lipids (**Fig. 3d**). This increase in ER-bound SM was  
225 accompanied by a two-fold rise in DAG levels and a significant drop in the amount of PC and  
226 ceramide, consistent with the presence of a catalytically active SM synthase in the ER. Interestingly,  
227 expression of SMS2<sup>M64R</sup> also led to a marked (1.8-fold) increase in ER-associated PE levels. In  
228 contrast, ER levels of cholesterol and other bulk lipids were largely unaffected. However, we noticed  
229 that expression of SMS2<sup>M64R</sup> enhanced unsaturation of bulk phospholipid in the ER, as indicated by a  
230 significant rise in di-unsaturated PC at the expense of saturated and mono-unsaturated PC species  
231 (**Fig. 3e**). PC chain length, on the other hand, was not affected. Strikingly, SMS2<sup>M64R</sup> expression also  
232 caused a sharp increase in ER-bound ceramide-1-phosphate (Cer1P). Moreover, cellular Cer1P  
233 levels were essentially abolished in SM synthase-deficient cells, indicating that production of Cer1P is  
234 tightly coupled to SM biosynthesis.

235

236 The PM from  $\Delta$ SMS1/2 cells expressing SMS2 had a SM content similar to the PM from wildtype cells  
237 (~10 mol%). In comparison, the PM from  $\Delta$ SMS1/2 cells expressing SMS2<sup>M64R</sup> had a slightly reduced  
238 SM content (~8 mol%) even though the total SM content of these cells was considerably higher (**Fig.**  
239 **4d**). PM-associated levels of cholesterol and other bulk lipids did not show any obvious differences  
240 among the various cell lines, except for an increase in PC and lack of SM in SMS-deficient cells. The  
241 PM from all four cell lines contained significantly elevated levels of saturated PC species in  
242 comparison to the ER. In addition, the PM from  $\Delta$ SMS1/2 cells expressing SMS2<sup>M64R</sup> contained 4-fold  
243 higher levels of dihydroSM (T. Sokoya, K. Maeda, and J. Holthuis, unpublished data), consistent with  
244 the ER residency of this enzyme. Collectively, these data indicate that pathogenic SMS2 variants  
245 disrupt the SM gradient along the secretory pathway and cause substantial changes in the lipid profile  
246 of the ER.

247

248 To confirm that cells expressing pathogenic SMS2 variants accumulate SM in the ER, we next used  
249 an engineered version of equinatoxin II (Eqt) as non-toxic SM reporter. To enable detection of SM  
250 inside the secretory pathway, the reporter was equipped with the N-terminal signal sequence of  
251 human growth hormone and tagged at its C-terminus with oxGFP, yielding EqtSM<sub>SS</sub> (Deng et al.,  
252 2016). A luminal Eqt mutant defective in SM binding, EqtSol<sub>SS</sub>, served as control. When expressed in  
253 human osteosarcoma U2OS cells, both EqtSM<sub>SS</sub> and EqtSol<sub>SS</sub> showed a reticular distribution that

254 overlapped extensively with the ER marker protein VAP-A (**Fig. 5a**). However, upon co-expression  
255 with SMS2<sup>M64R</sup>, EqtSM<sub>SS</sub> but not EqtSol<sub>SS</sub> displayed a distinct punctate distribution that coincided with  
256 the ER network. EqtSM<sub>SS</sub>-containing puncta were not observed upon co-expression with the enzyme-  
257 dead variant SMS2<sup>M64R/D276A</sup>, indicating that their formation strictly relies on SM production in the ER  
258 (**Fig. 5a**). To verify that the EqtSM<sub>SS</sub>-positive puncta mark ER-resident pools of SM, U2OS cells co-  
259 expressing EqtSM<sub>SS</sub> and SMS2<sup>M64R</sup> were subjected to hypotonic swelling as described before (King et  
260 al., 2020). After incubation for 5 min in hypotonic medium, the ER's fine tubular network transformed  
261 into numerous micrometer-sized vesicles. In SMS2<sup>M64R</sup>-expressing cells, the membranes of these ER-  
262 derived vesicles were extensively labelled with EqtSM<sub>SS</sub> (**Fig. 5b**). In contrast, in hypotonic cells co-  
263 expressing EqtSM<sub>SS</sub> with SMS2<sup>M64R/D276A</sup> or EqtSol<sub>SS</sub> with SMS2<sup>M64R</sup>, the reporter was found  
264 exclusively in the lumen of ER-derived vesicles, indicating that Eqt staining of the ER membrane  
265 critically relies on catalytically active SMS2<sup>M64R</sup> and a SM-binding competent reporter. In agreement  
266 with the ER lipidome analyses, these results demonstrate that cells expressing SMS2<sup>M64R</sup> accumulate  
267 bulk amounts of SM in the ER. Moreover, our finding that hypotonic swelling of SMS2<sup>M64R</sup>-expressing  
268 cells transforms the ER-associated punctate distribution of EqtSM<sub>SS</sub> to a more uniform labeling of the  
269 ER bilayer suggests that alterations in membrane curvature and/or lipid packing may affect the lateral  
270 organization of Eqt-SM assemblies.

271

### 272 **Pathogenic SMS2 variants break transbilayer SM asymmetry**

273 SM adopts an asymmetric distribution across the bilayers of late secretory and endolysosomal  
274 organelles, with the bulk of SM residing in the luminal/exoplasmic leaflet. However, using GFP-tagged  
275 EqtSM as cytosolic SM reporter (EqtSM<sub>cyto</sub>), we found that perturbation of lysosome or PM integrity by  
276 pore-forming chemicals or toxins disrupts transbilayer SM asymmetry by triggering a rapid  
277 transbilayer movement of SM catalyzed by Ca<sup>2+</sup>-activated scramblases (Niekamp et al., 2022). To  
278 perform its central task in membrane biogenesis, the ER harbors constitutively active scramblases  
279 that enable a rapid equilibration of newly synthesized phospholipids across its bilayer (Pomorski and  
280 Menon, 2016). We therefore asked whether SM produced by pathogenic SMS2 variants in the ER  
281 lumen has access to the cytosolic leaflet. As expected, EqtSM<sub>cyto</sub> in wildtype or ΔSMS1/2 cells  
282 expressing SMS2 displayed a cytosolic distribution. In contrast, expression of pathogenic variant  
283 SMS2<sup>I62S</sup> or SMS2<sup>M64R</sup> in each case caused EqtSM<sub>cyto</sub> to accumulate in numerous puncta that were  
284 dispersed throughout the cytosol (**Fig. 6a; Fig. S3a**). Importantly, formation of Eqt-positive puncta  
285 required expression of a catalytically active pathogenic variant and was not observed when using SM  
286 binding-defective cytosolic reporter EqtSol<sub>cyto</sub> (**Fig. S3b**). These results indicate that pathogenic SMS2  
287 variants disrupt transbilayer SM asymmetry, presumably because ER-resident scramblases enable  
288 SM produced by these variants to readily equilibrate across the ER bilayer.

289

290 Remarkably, the Eqt-positive puncta formed in SMS2<sup>I62S</sup> or SMS2<sup>M64R</sup>-expressing cells were largely  
291 segregated from a wide array of organellar markers, including VAPA (ER), Sec16L (ER exit sites),  
292 ERGIC-53 (*cis*-Golgi), GM130 (*medial*-Golgi), TGN64 (*trans*-Golgi), EEA1 (early endosomes), LAMP1  
293 (lysosomes) and LD540 (lipid droplets; **Fig. 6b**). Moreover, when cells expressing SMS2<sup>I62S</sup> or



294 SMS2<sup>M64R</sup> were subjected to hypotonic swelling, Eqt-positive puncta remained largely segregated  
295 from ER-derived microvesicles (T. Sokoya and J. Holthuis, unpublished data). Conceivably, formation  
296 of Eqt-SM assemblies on the cytosolic surface of the ER may drive a process whereby SM-rich  
297 membrane domains are pinched off from the organelle. However, our efforts to capture such vesicles  
298 by correlative light-electron microscopy were unsuccessful. Therefore, the precise nature of the Eqt-  
299 positive puncta observed in cells expressing pathogenic variants remains to be established.

300

301 The foregoing implies that in cells expressing pathogenic SMS2 variants, only part of the SM arriving  
302 at the PM would reside in the exoplasmic leaflet and that a portion may be mislocalized to the  
303 cytosolic leaflet. To challenge this idea, we stained the surface of intact wildtype or  $\Delta$ SMS1/2 cells  
304 expressing SMS2 or SMS2<sup>M64R</sup> with recombinant EqtSM. Cell surface labeling was visualized by  
305 fluorescence microscopy and quantitatively assessed by flow cytometry. As shown in **Fig. 7a**,  
306 wildtype cells could be readily stained with the SM reporter whereas  $\Delta$ SMS1/2 cells were devoid of  
307 EqtSM staining. Expression of SMS2, but not enzyme-dead SMS2<sup>D276A</sup>, restored EqtSM staining of  
308  $\Delta$ SMS1/2 cells to a level approaching that of wildtype cells. In contrast, expression of SMS2<sup>M64R</sup>  
309 restored cell surface staining to only a minor degree (**Fig. 7a, b**) even though the PM-associated SM  
310 pool of these cells was close to that of wildtype or SMS2-expressing  $\Delta$ SMS1/2 cells (**Fig. 4d**).  
311 Collectively, these data suggest that pathogenic SMS2 variants undermine the ability of cells to  
312 establish transbilayer SM asymmetry.

313

#### 314 **Pathogenic SMS2 variants affect membrane lipid order along the secretory pathway**

315 Owing to its saturated nature and affinity for sterols, SM contributes significantly to lipid order in  
316 cellular membranes. As pathogenic SMS2 variants enhance SM levels in the ER and undermine the  
317 ability of cells to concentrate SM on their surface, we next measured the lipid order at these locations  
318 in cells expressing SMS2 or SMS2<sup>M64R</sup> using two Nile Red (NR)-based solvatochromic probes,  
319 NR12A and NRER<sub>Cl</sub> (Danylchuk et al., 2019, 2021). The emission spectra of these probes are blue-  
320 shifted in tightly packed lipid bilayers, which is due to a reduced polarity in the nano-environment of  
321 the NR fluorophore. The relative extent of these spectral shifts can be quantified in cellular  
322 membranes using ratiometric imaging. In NR12A, the presence of a charged membrane anchor group  
323 that blocks passive flip-flop across membrane bilayers makes this probe ideally suited to selectively  
324 quantify lipid order in the outer PM leaflet of live cells when added to the extracellular medium  
325 (Danylchuck et al., 2019). On the other hand, a propyl chloride group in NRER<sub>Cl</sub> targets this probe to  
326 the ER (Danylchuck et al., 2021). As expected, the lipid order reported by NR12A in the outer PM  
327 leaflet of SM-deficient  $\Delta$ SMS1/2 cells was drastically reduced in comparison to that of wildtype cells  
328 (**Fig. 7c, d**). Expression of SMS2 partially restored lipid order. In contrast, expression of SMS2<sup>M64R</sup>  
329 failed to restore lipid order to any appreciable degree. Conversely, the lipid order reported by NRER<sub>Cl</sub>  
330 in the ER of SMS2<sup>M64R</sup>-expressing cells was significantly enhanced in comparison to that in the ER of  
331 SMS2-expressing cells (**Fig. 7e, f**). Hence, the perturbation of subcellular SM distributions caused by  
332 pathogenic SMS2 variants is accompanied by major imbalances in lipid order along the secretory  
333 pathway.

### 334 **Pathogenic SMS2 variants perturb subcellular cholesterol pools**

335 As preferred cholesterol interaction partner, SM directly participates in the subcellular organization of  
336 cholesterol (Slotte, 2013; Das et al., 2014). Therefore, it was surprising that the marked accumulation  
337 of SM in the ER of SMS<sup>M64R</sup>-expressing cells had no obvious impact on ER-bound cholesterol levels  
338 (**Fig. 3d**) or the cellular pool of cholesteryl esters (T. Sokoya, K. Maeda, and J. Holthuis, unpublished  
339 data). To further examine whether pathogenic SMS2 variants influence cholesterol organization in  
340 cells, we used a mCherry-tagged D4H sterol reporter derived from the perfringolysin O  $\theta$ -toxin of  
341 *Clostridium perfringens*. This reporter recognizes cholesterol when present at >20 mol% in  
342 membranes and mainly decorates the inner leaflet of the PM at steady state when expressed as  
343 cytosolic protein. Part of the reason for the high detection threshold is that the reporter detects free  
344 cholesterol in the membrane but not cholesterol in complex with SM (Das et al., 2014). Moreover, a  
345 previous study showed that plasmalemmal PS is essential for retaining D4H-accessible cholesterol in  
346 the inner PM leaflet (Maekawa and Fairn, 2015). Accordingly, we found that cytosolic D4H-mCherry  
347 primarily stained the PM in wildtype HeLa cells. In contrast, the probe displayed a more diffuse  
348 cytosolic distribution in  $\Delta$ SMS1/2 cells (**Fig. S4a**). Expression of SMS2 in  $\Delta$ SMS1/2 cells restored PM  
349 staining, indicating that PM-associated SM is critical for controlling the reporter-accessible cholesterol  
350 pool in the PM. Strikingly, in  $\Delta$ SMS1/2 cells expressing pathogenic variant SMS2<sup>M64R</sup> or SMS2<sup>I62S</sup>,  
351 D4H-mCherry did not label the PM but primarily accumulated in intracellular vesicles that were largely  
352 segregated from EqtSM<sub>cyto</sub>-positive puncta (**Fig. 8a**). These vesicles co-localized extensively with  
353 dextran-positive endolysosomal compartments (**Figs. 8b and S4b**). While it remains to be established  
354 how this shift in D4H-mCherry distribution is accomplished, it is conceivable that the presence of SM  
355 in the inner PM leaflet of cells expressing pathogenic SMS2 variants renders a coexisting cholesterol  
356 pool inaccessible to the reporter.

357  
358 Since cholesterol has a stronger affinity for SM than for PS or other phospholipid classes, altering the  
359 SM concentration affects the behavior of cholesterol in artificial and biological membranes (Slotte,  
360 2013). For instance, when exposed to the cholesterol-absorbing agent methyl- $\beta$ -cyclodextrin (m $\beta$ CD),  
361 SM-depleted cells readily lose PM-associated cholesterol and consequently their viability more rapidly  
362 than wildtype cells (Fukasawa et al., 2000; Hanada et al., 2003). As complementary approach to  
363 determine the impact of pathogenic SMS2 variants on cholesterol organization in the PM, we next  
364 probed  $\Delta$ SMS1/2 cells expressing wildtype or pathogenic SMS2 variants for their sensitivity toward  
365 m $\beta$ CD. As expected,  $\Delta$ SMS1/2 cells displayed a substantially reduced tolerance for m $\beta$ CD in  
366 comparison to wildtype cells (**Fig. 8c**). Expression of SMS2 restored m $\beta$ CD tolerance of  $\Delta$ SMS1/2  
367 cells to that of wildtype cells. In contrast, expression of SMS<sup>M64R</sup> or SMS2<sup>I62S</sup> in each case failed to  
368 render  $\Delta$ SMS1/2 cells resistant toward m $\beta$ CD. These results provide additional support for the notion  
369 that pathogenic SMS2 variants significantly affect cholesterol organization in the PM.

370

### 371 **Patient-derived fibroblasts display imbalances in SM distribution and lipid packing**

372 We next asked whether the aberrant SM and cholesterol distributions observed upon heterologous  
373 expression of pathogenic SMS2 variants also occur in cells of patients with OP-CDL. To address this,

374 skin fibroblasts derived from patients with the missense variant p.I62S or p.M64R and healthy controls  
375 were co-transfected with the luminal SM reporter EqtSM<sub>SS</sub> and mCherry-tagged VAPA as ER marker.  
376 Next, the fibroblasts were subjected to hypotonic swelling and imaged by fluorescence microscopy.  
377 Strikingly, in patient fibroblasts the membranes of ER-derived vesicles were extensively labelled with  
378 EqtSM<sub>SS</sub> (**Fig. 9a**). In contrast, in fibroblasts of healthy controls, EqtSM<sub>SS</sub> was found exclusively in the  
379 lumen of ER-derived vesicles. This indicates that the ER in patient fibroblasts contains substantially  
380 elevated SM levels. In addition, we found that the cytosolic SM reporter EqtSM<sub>cyto</sub> accumulated in  
381 numerous puncta when expressed in patient fibroblasts while its expression in fibroblasts of healthy  
382 controls resulted in a diffuse cytosolic distribution (**Fig. 9b**). Formation of Eqt-positive puncta in  
383 patient fibroblasts did not occur when using the SM binding-defective reporter, EqtSol<sub>cyto</sub>. Thus,  
384 besides accumulating SM in the ER, patient fibroblasts display a breakdown of transbilayer SM  
385 asymmetry. Interestingly, these aberrant SM distributions were accompanied by significant alterations  
386 in lipid order on the cell surface (**Fig. 9c**) and in the ER (**Fig. 9d**). Moreover, while the cytosolic  
387 cholesterol reporter D4H-mCherry primarily stained the PM of fibroblasts of healthy controls, in patient  
388 fibroblasts a substantial portion of the reporter was shifted to intracellular vesicles (**Fig. S5**). This  
389 indicates that pathogenic SMS2 variants p.I62S and p.M64R, which underly a spectrum of severe  
390 skeletal conditions, affect the subcellular organization of SM and cholesterol to an extend large  
391 enough to impact on the lipid order along membranes of the secretory pathway.

392  
393

## 394 DISCUSSION

395

396 SM in mammalian cells is specifically enriched in the exoplasmic leaflets of the PM, the *trans*-Golgi  
397 and endolysosomal organelles. While maintenance of its nonrandom subcellular distribution is thought  
398 to be relevant for a variety of physiological processes, experimental proof for this concept is scarce.  
399 Here we show that inborn pathogenic SMS2 variants p.M64R and p.I62S identified in patients with a  
400 severe form of OP-CDL cause profound perturbations in the subcellular organization of SM and  
401 cholesterol. We find that both variants retain full enzymatic activity but are unable to leave the ER  
402 owing to a defective autonomous ER export signal in their *N*-terminal cytosolic tails. Consequently,  
403 bulk SM production is mistargeted to the ER, the site for *de novo* synthesis of the SM precursor  
404 ceramide. Cells expressing pathogenic SMS2 variants accumulate PM-like SM levels in the ER and  
405 display a disrupted transbilayer SM asymmetry, presumably owing to a constitutive SM scrambling  
406 across the ER bilayer. These aberrant SM distributions also occur in OP-CDL patient fibroblasts and  
407 are accompanied by significant imbalances in cholesterol organization, glycerophospholipid profiles  
408 and membrane lipid order in the secretory pathway. Based on these findings, we postulate that  
409 pathogenic SMS2 variants undermine the capacity of osteogenic cells to uphold nonrandom lipid  
410 distributions that are critical for their bone forming activity.

411

412 As SM is the preferred interaction partner of cholesterol (Slotte, 2013), its bulk production in the *trans*-  
413 Golgi would promote formation of a cholesterol gradient along the secretory pathway. However, our  
414 lipidomics data indicate that cells harboring a pathogenic SMS2 variant retain the ability to

415 concentrate cholesterol in the PM and keep its ER levels low in spite of a dissipated SM gradient. This  
416 implies that cells are equipped with an effective mechanism to prevent a toxic rise of cholesterol in ER  
417 bilayers with an abnormally high SM content. One mechanism for removing excess cholesterol from  
418 the ER involves its esterification and storage in lipid droplets. However, pathogenic SMS2 variants  
419 had no impact on the cellular pool of cholesteryl esters. An alternative mechanism involves the  
420 oxysterol binding protein OSBP, which mediates net transfer of cholesterol from the ER to the *trans*-  
421 Golgi. OSBP-catalyzed transport of cholesterol against its concentration gradient is energized by  
422 counter transport of phosphatidylinositol-4-phosphate (PI4P), a lipid continuously produced in the  
423 *trans*-Golgi and turned over in the ER (Mesmin et al., 2013). As critical determinant of intracellular  
424 cholesterol flows, the cholesterol/PI4P exchange activity of OSBP also influences membrane lipid  
425 order in the secretory pathway (Mesmin et al., 2017). Therefore, future studies addressing whether  
426 pathogenic SMS2 variants cause an upregulation of the PI4P-consuming OSBP cycle to counteract  
427 thermodynamic trapping of cholesterol by an expanding SM pool in the ER may prove fruitful.

428  
429 The PI4P-dependent countertransport mechanism found to energize net transfer of cholesterol also  
430 helps drive PS export from the ER and creation of a PS gradient along the secretory pathway (Chung  
431 et al., 2015; Moser von Filseck et al., 2015). Our current findings indicate that such mechanism does  
432 not exist for SM and that the ER is ill equipped to effectively remove bulk amounts of SM produced  
433 there. In the absence of any lipid transfer protein dedicated to mediate anterograde SM transport, the  
434 only mechanism available for SM to leave the ER is by vesicular transport. Previous work revealed  
435 that SM and cholesterol are depleted from COPI-coated vesicles compared with their donor Golgi  
436 cisternae (Brügger et al., 2000). This finding supports the view that formation of the SM gradient along  
437 the secretory pathway relies on a mechanism that prevents *trans*-Golgi-derived SM from gaining  
438 access to retrograde-moving COPI vesicles. Experiments with giant unilamellar vesicles containing  
439 ternary mixtures of PC, SM and cholesterol provide evidence for curvature-based lipid sorting by  
440 demonstrating that membrane tubes pulled from the giant vesicles are efficiently depleted of SM and  
441 cholesterol relative to vesicle membranes with negligible curvature (Roux et al., 2005). The same  
442 principle may hamper an efficient COPII-mediated export of SM from the ER, thus contributing to  
443 dissipation of the SM gradient in cells harboring pathogenic SMS2 variants.

444  
445 Membrane biogenesis in the ER requires cross-bilayer movement of phospholipids, which is mediated  
446 by ER-resident scramblases (Pomorski and Menon, 2016; Ghanbarpour et al., 2021; Huang et al.,  
447 2021). These scramblases display low specificity, with phospholipids and sphingolipids being  
448 translocated with similar kinetics (Buton et al., 2002; Chalal et al., 2012). Consequently, SM produced  
449 by pathogenic SMS2 variants in the luminal leaflet of the ER should readily equilibrate with the  
450 cytosolic leaflet. Indeed, we found that both p.M64R and p.I62S variants triggered mobilization of a  
451 cytosolic SM reporter. Moreover, cells expressing the p.M64R variant had similar levels of SM in the  
452 PM as controls but showed a significantly reduced SM reporter staining of their surface, signifying a  
453 disrupted transbilayer SM asymmetry. Consistent with a reduced SM pool in the exoplasmic leaflet,  
454 these cells also displayed a lower lipid packing on their surface and lost their viability more rapidly

455 when exposed to a cholesterol-absorbing agent than controls. Consistent with an elevated SM pool in  
456 the cytosolic leaflet, we found that pathogenic SMS2 variants constrained accessibility of PM-  
457 associated cholesterol for a cytosolic sterol reporter that recognizes free cholesterol but not  
458 cholesterol sequestered by SM (Das et al., 2014). From this we infer that pathogenic SMS2 variants  
459 in fact abolish two types of SM gradients: one running along the secretory pathway and the other one  
460 across the bilayers of secretory organelles. Disruption of the latter affects the equilibrium between  
461 active and SM-sequestered cholesterol pools on both sides of the PM.

462

463 Our study also yields insights into how cells cope with a major assault on the lipid composition and  
464 membrane properties of the ER. The dramatic rise in ER-associated SM levels caused by pathogenic  
465 SMS2 variants was accompanied by a marked increase in PC desaturation and a nearly two-fold  
466 expansion of the ethanolamine-containing phospholipid pool. While it remains to be established how  
467 these alterations are implemented, it is conceivable that they serve to buffer the physical properties of  
468 the ER bilayer from SM-induced perturbations. Owing to the low degree of unsaturation in its  
469 carbohydrate chains, SM forms a taller, narrower cylinder than PC, which increases its packing  
470 density and affinity for cholesterol (Slotte, 2013). These features are ideally suited to support the  
471 barrier function of the PM but undermine the biogenic activities of the ER, which require a more  
472 loosely packed lipid bilayer (Bigay and Antonny, 2012; Nilsson et al., 2001). Thus, an enhanced  
473 desaturation and rise in cone-shaped, ethanolamine-containing phospholipids may be part of an  
474 adaptive cellular response to cancel out a SM-mediated rigidification of the ER bilayer and preserve  
475 the organelle's central role in membrane biogenesis and secretion. Strikingly, pathogenic SMS2  
476 variants also caused a sharp rise in ER-associated Cer1P levels. Cer1P is produced by ceramide  
477 kinase CERK and functions as a key signaling lipid in the regulation of cell growth, survival and  
478 inflammation (Presa et al., 2020). In addition to stimulating production of arachidonic acid and pro-  
479 inflammatory cytokines through direct activation of a specific cytosolic phospholipase (Lamour et al.,  
480 2009), Cer1P promotes cell survival at least in part by blocking enzymes involved in ceramide  
481 production (Granado et al., 2009). Our present findings indicate that Cer1P production is tightly  
482 coupled to SM biosynthesis. The prospect that CERK-mediated Cer1P formation serves a role in the  
483 mechanism by which cells sense and respond to imbalances in the lipid composition of their secretory  
484 organelles merits further consideration.

485

486 How does a disrupted subcellular organization of SM and cholesterol caused by pathogenic SMS2  
487 variants lead to osteoporosis and skeletal dysplasia? Addressing this question obviously requires  
488 experimental models beyond the engineered cell lines and patient-derived fibroblasts used in this  
489 study. A quantitative analysis of SMS2 transcript levels in a murine tissue panel revealed the highest  
490 expression in cortical bone and vertebrae (Pekkinen et al., 2019). This implies that the impact of  
491 pathogenic SMS2 variants on the lipid composition of secretory organelles will be most severe in  
492 bone cells of the affected individuals. Bone formation involves deposition of collagen fibrils into a  
493 matrix and its subsequent mineralization. Interestingly, pathogenic variants of core components of  
494 COPII-coated vesicles have been reported to cause craniofacial and skeletal defects by selectively

495 disrupting procollagen export from the ER (Boyadjiev et al., 2006; Garbes et al., 2015). Moreover,  
496 loss of TANGO1, an ER-resident transmembrane protein required for packaging the bulky procollagen  
497 fibers into COPII vesicles, results in neonatal lethality due to insufficient bone mineralization  
498 (Guillemyen et al., 2021). It is conceivable that ER export of procollagen is particularly susceptible to  
499 the bilayer rigidifying effect of bulk SM production by pathogenic SMS2 variants.

500

501 However, an alternative scenario is that a loss of transbilayer SM asymmetry at the PM of osteogenic  
502 cells in OP-CDL patients negatively affects bone mineralization. This process involves matrix vesicles  
503 that bud off from the apical membrane of osteoblasts and deposit their  $\text{Ca}^{2+}$  and phosphate-rich  
504 content where matrix mineralization is propagated (Murshed, 2018). Bone mineralization also critically  
505 relies on neutral SMase-2 (SMPD3), a membrane-bound enzyme that cleaves SM in the cytosolic  
506 leaflet of the PM to generate ceramide and phosphocholine (Aubin et al., 2005). How nSMase-2 gains  
507 access to SM, which is normally concentrated in the exoplasmic leaflet, is unclear. We recently  
508 showed that minor lesions in PM integrity initiates a rapid SM scrambling mediated by the  $\text{Ca}^{2+}$ -  
509 activated scramblase TMEM16F (Niekamp et al., 2022). Intriguingly, loss of TMEM16F leads to  
510 decreased mineral deposition in skeletal tissues (Ehlen et al., 2013), suggesting that this process may  
511 require a TMEM16F-mediated supply of exoplasmic SM to nSMase-2 for SM hydrolysis in the  
512 cytosolic leaflet. This arrangement may serve to ensure a continuous supply of phosphocholine as a  
513 source of phosphate required for normal bone mineralization (Pekkinen et al., 2019). By disrupting  
514 SM asymmetry, pathogenic SMS2 variants may cause premature depletion of the lipid-based  
515 phosphate store, thus interfering with normal bone mineralization. Moreover, ceramides formed during  
516 SM hydrolysis by nSMase-2 in the cytosolic leaflet of the PM may also play a critical role. Owing to  
517 their cone-shaped structure, ceramides released by SM turnover readily self-assemble into  
518 microdomains that possess a negative spontaneous curvature (Alonso and Goñi, 2018). By causing a  
519 local condensation of the cytosolic leaflet, nSMase-mediated conversion of SM to ceramide could  
520 promote an inverse budding of the bilayer away from the cytosol. We envision that this process may  
521 stimulate the biogenesis of matrix vesicles required for normal bone mineralization. According to this  
522 model, pathogenic SMS2 variants may interfere with matrix vesicle formation because dissipation of  
523 transbilayer SM asymmetry across the PM would deplete the fuel that drives this process.

524

525 In sum, the present study indicates that bone critical SMS2 variants p.M64R and p.I62S exert their  
526 pathogenic effects by redirecting bulk SM production to the ER, thereby causing significant deviations  
527 in organellar lipid compositions and membrane properties along the secretory pathway. Besides  
528 highlighting how cells respond to a major assault on the lipid code of the early secretory pathway, our  
529 findings provide important insights into the pathogenic mechanism underlying OP-CDL.

530

531 **METHODS**

532

533 **Chemical reagents**

534 Chemical reagents used were: doxycycline (Sigma Aldrich, D891), puromycin (Sigma Aldrich, P8833),  
535 polybrene (Sigma-Aldrich, TR-1003), methyl- $\beta$ -cyclodextrin (Sigma Aldrich, C4555), G418 (Sigma-  
536 Aldrich, G8168), and 3-azido-7-hydroxycoumarin (Jena Bioscience, CLK-FA047). LD540 dye was a  
537 kind gift from Christoph Thiele (University of Bonn, Germany) and described in (Spandl et al., 2009).  
538 NR12A and NR-ER<sub>cl</sub> were synthesized as described in (Danylchuk et al., 2021).

539

540 **Antibodies**

541 Antibodies used were: rabbit polyclonal anti-calnexin (Santa Cruz, sc-11397; IB 1:1,000), goat  
542 polyclonal anti-calnexin (Santa Cruz, sc-6495; IF 1:200, IB 1:1,000), rabbit polyclonal anti- $\beta$ -calnexin  
543 (Abcam, ab10286; IP 1:1,000), mouse monoclonal anti-FLAG-tag (Abcam, ab205606; IB 1:1,000; IF  
544 1:400), mouse monoclonal anti-SMS2 (Santa Cruz, sc-293384; IB 1:1,000), mouse monoclonal anti- $\beta$ -  
545 actin (Sigma, A1978; IB 1:50,000), mouse monoclonal anti-mitochondrial surface p60 (Millipore,  
546 MAB1273; IB 1:1,000), mouse monoclonal anti-Na/K ATPase (Santa Cruz, sc-48345; IB 1:1,000),  
547 rabbit monoclonal anti-Na/K ATPase (Abcam, ab-76020; IB 1:1,000; IF 1:400), mouse monoclonal  
548 anti-ERGIC53 (Novus, np62-03381; IF 1:400), mouse monoclonal anti-GM130 (BD biosciences,  
549 610823; IF 1:400), sheep polyclonal anti-TGN46 (Bio-Rad, AHP1586; IF 1:400), mouse monoclonal  
550 anti-EEA1 (Cell Signaling, 48453; IF 1:400), mouse monoclonal anti-LAMP-1 (Santa Cruz, sc-20011;  
551 IB 1:1,000; IF 1:400), HRP-conjugated goat anti-rabbit IgG (Thermo Fisher Scientific, 31460; IB  
552 1:5,000), HRP-conjugated goat anti-mouse IgG (Thermo Fisher Scientific, 31430; IB 1:5,000), HRP-  
553 conjugated donkey anti-goat IgG (Thermo Fisher Scientific; PA1-28664; IB 1:5,000), Dylight 488-  
554 conjugated donkey-anti-sheep/goat IgG (Bio-Rad, STAR88D488GA; IF 1:400), Cyanine Cy<sup>TM</sup>2-  
555 conjugated donkey anti-mouse IgG (Jackson ImmunoResearch Laboratories, 715-225-150; IF 1:400);  
556 Cyanine Cy<sup>TM</sup>2-conjugated donkey anti-rabbit IgG (Jackson ImmunoResearch Laboratories, 711-225-  
557 152; IF 1:400); Cyanine Cy<sup>TM</sup>3-conjugated donkey anti-rabbit IgG (Jackson ImmunoResearch  
558 Laboratories, 715-165-152; IF 1:400); Cyanine Cy<sup>TM</sup>3-conjugated donkey anti-mouse IgG (Jackson  
559 ImmunoResearch Laboratories, 715-165-150; IF 1:400); Cyanine Cy<sup>TM</sup>3-conjugated donkey anti-goat  
560 IgG (Jackson ImmunoResearch Laboratories, 705-165-147; IF 1:400), Cyanine Cy<sup>TM</sup>5-conjugated  
561 donkey anti-rabbit IgG (Jackson ImmunoResearch Laboratories, 711-175-152; IF 1:400) and Cyanine  
562 Cy<sup>TM</sup>5-conjugated donkey anti-goat IgG (Jackson ImmunoResearch Laboratories, 705-175-147; IF  
563 1:400).

564

565 **DNA constructs**

566 pcDNA3.1(+) encoding *N*-terminal FLAG-tagged SMS2, SMS2<sup>62S</sup> and SMS2<sup>M64R</sup> were described in  
567 (Pekkinen et al., 2019). DNA encoding *N*-terminal FLAG-tagged chimera SMSr-SMS2<sub>11-77</sub> was  
568 synthetically prepared (IDT, Belgium) and inserted into pcDNA3.1(+) using BamHI and NotI restriction  
569 sites. Pathogenic mutations were introduced using a QuickChangeII site-directed mutagenesis kit  
570 (Agilent Technologies, USA) and primers listed in Supplementary Table S1. To prepare lentiviral

571 expression constructs, the ORF of FLAG-tagged SMS2 was PCR amplified using pcDNA3.1-FLAG-  
572 SMS2 as a template. The amplified DNA was inserted into pENTR™11 (Invitrogen, A10467) using the  
573 BamHI and NotI restriction sites. Pathogenic mutations and/or mutations affecting active site residue  
574 Asp276 were introduced by site-directed mutagenesis as described above. The inserts of the  
575 pENTR™11 constructs were transferred into the lentiviral expression vector pInducer20 (Addgene,  
576 44012) using Gateway cloning (Invitrogen) according to the manufacturer's instructions. The  
577 constructs encoding FLAG-tagged EqtSM (pET28a-EQ-SM-3xFLAG), GFP-tagged EqtSM<sub>SS</sub> (pN1-  
578 EqtSM<sub>SS</sub>-oxGFP) and GFP-tagged EqtSol<sub>SS</sub> (pN1-EqtSol<sub>SS</sub>-oxGFP) were described in (Deng et al.,  
579 2016). The constructs encoding GFP-tagged EqtSM<sub>cyto</sub> (pN1-EqtSM<sub>cyto</sub>-oxGFP), GFP-tagged  
580 EqtSol<sub>cyto</sub> (pN1-EqtSol<sub>cyto</sub>-oxGFP) and mKate-tagged EqtSM<sub>cyto</sub> (pN1-EqtSM<sub>cyto</sub>-mkate) were  
581 described in (Niekamp *et al.*, 2022). The construct encoding mCherry-tagged VAPA was described in  
582 (Jain et al., 2017). The construct encoding GFP-tagged Sec16L (pEFP-C1-Sec16L) was a kind gift  
583 from Benjamin Glick (University of Chicago, USA) and described in (Bhattacharyya and Glick, 2007).  
584 The expression construct encoding mCherry-tagged D4H (pN1-D4H-mCherry) was kindly provided by  
585 Gregory Fairn (University of Toronto, Canada) and described in (Maekawa and Fairn, 2015).

586

#### 587 **Mammalian cell culture and transfection**

588 Human fibroblasts derived from skin biopsies of OP-CDL patients and healthy controls were  
589 previously described in (Pekkinen et al., 2019). Human fibroblasts, human cervical carcinoma HeLa  
590 cells (ATCC CCL-2), human osteosarcoma epithelial U2OS cells (ATCC HTB-96), and human  
591 embryonic kidney 293 cells transformed with Simian Virus 40 large T antigen (HEK293T, ATCC CRL-  
592 3216) were cultured in high glucose Dulbecco's modified Eagle's medium (DMEM) containing 2 mM  
593 L-glutamine and 10% FBS, unless indicated otherwise. A HeLa cell-line lacking SMS1 and SMS2  
594 ( $\Delta$ SMS1/2) was described previously (Niekamp et al., 2022). DNA transfections were carried out  
595 using Lipofectamine 3000 (Thermo Fisher Scientific, L3000001) according to the manufacturer's  
596 instructions.

597

#### 598 **Lentiviral transduction**

599 HeLa  $\Delta$ SMS1/2 cells were stably transduced with pInducer20 constructs encoding FLAG-tagged  
600 SMS2, SMS2<sup>D276A</sup>, SMS2<sup>I62S</sup>, SMS2<sup>I62S/D276A</sup>, SMS2<sup>M64R</sup> or SMS2<sup>M64R/D276A</sup>. To this end, low passage  
601 HEK293T cells were co-transfected with the corresponding pInducer20-FLAG-SMS2 construct and  
602 the packaging vectors psPAX2 (Addgene, 12260) and pMD2.G (Addgene, 12259). Culture medium  
603 was changed 6 h post-transfection. After 48 h, the lentivirus-containing medium was harvested,  
604 passed through a 0.45  $\mu$ m filter, mixed 1:1 (v/v) with DMEM containing 8  $\mu$ g/ml polybrene and used to  
605 infect HeLa  $\Delta$ SMS1/2 cells. At 24 h post-infection, the medium was replaced with DMEM containing 1  
606 mg/ml G418 and selective medium was changed daily. After 5 days, positively transduced cells were  
607 analyzed for doxycycline-dependent expression of the FLAG-tagged SMS2 variant using immunoblot  
608 analysis, immunofluorescence microscopy and metabolic labeling with clickSph, as described below.

609

#### 610 **Cell lysis and immunoblot analysis**



611 Cells were harvested and lysed in Lysis Buffer (1% TritonX-100, 1 mM EDTA pH 8.0, 150 mM NaCl,  
612 20 mM Tris pH 7.5) supplemented with Protease Inhibitor Cocktail (PIC; 1 µg/ml aprotinin, 1 µg/ml  
613 leupeptin, 1 µg/ml pepstatin, 5 µg/ml antipain, 157 µg/ml benzamidine). Nuclei were removed by  
614 centrifugation at 600 x g for 10 min at 4°C. Post nuclear supernatants were collected and stored at –  
615 80°C until use. Protein samples were mixed with 2x Laemmli Sample Buffer (0.3 M Tris HCl, pH 6.8,  
616 10% SDS, 50% glycerol, 10% 2-β-mercaptoethanol, 0.025 % bromphenol blue), resolved by SDS-  
617 PAGE using 12% acrylamide gels, and transferred onto nitrocellulose membrane (0.45 µm; GE Health  
618 Sciences USA). Membranes were blocked with 5% non-fat milk solution for 40 min and washed with  
619 0.05% Tween in PBS (PBST). Next, membrane was incubated for 2 h with primary antibody in PBST,  
620 washed three times with PBST and incubated with HRP-conjugated secondary antibody in PBST.  
621 After washing in PBST, the membranes were developed using enhanced chemiluminescence  
622 substrate (ECL; Thermo Fisher Scientific, USA). Images were recorded using a ChemiDoc XRS+  
623 System (Bio-Rad, USA) and processed with Image Lab Software (BioRad, USA).

624

#### 625 **Metabolic labelling and TLC analysis**

626 Cells were metabolically labeled for 24 h with 4 µM clickable sphingosine in Opti-MEM reduced serum  
627 medium without Phenol red (Gibco, 11058). Next, cells were washed with PBS, harvested, and  
628 subjected to Bligh and Dyer lipid extraction (Bligh and Dyer, 1959). Dried lipid films were click reacted  
629 in a 40 µl reaction mix containing 0.45 mM fluorogenic dye 3-azido-7-hydroxycoumarin (Jena  
630 Bioscience, CLK-FA047), 1.4 mM Cu(I)tetra(acetonitrile) tetrafluoroborate and 66 %  
631 EtOH:CHCl<sub>3</sub>:CH<sub>3</sub>CN (66:19:16, v:v:v). Reaction mixtures were incubated at 40°C for 4 h followed by  
632 12 h incubation at 12°C and applied at 120 nl/s to NANO-ADAMANT HP-TLC plates (Macherey-  
633 Nagel, Germany) with a CAMAG Linomat 5 TLC sampler (CAMAG, Switzerland). The TLC plate was  
634 developed in CHCl<sub>3</sub>:MeOH:H<sub>2</sub>O:AcOH 65:25:4:1, v:v:v:v using a CAMAG ADC2 automatic TLC  
635 developer (CAMAG, Switzerland). The coumarin-derivatized lipids were visualized using a ChemiDoc  
636 XRS+ with UV-transillumination and Image Lab Software (BioRad, USA).

637

#### 638 **Fluorescence microscopy**

639 For immunofluorescence microscopy, cells were grown on glass coverslips and fixed in 4%  
640 paraformaldehyde (PFA) for 15 min at RT. After quenching in 50 mM ammonium chloride, cells were  
641 permeabilized with permeabilization buffer (PBS containing 0.3% (v/v) Triton-X100 and 1% (v/v) BSA)  
642 for 15 min. Immunostaining was performed in permeabilization buffer and nuclei were counterstained  
643 with DAPI, as described in (Jain et al., 2017). Coverslips were mounted onto glass slides using  
644 ProLong Gold Antifade Reagent (Thermo Fisher Scientific, USA). Fluorescence images were  
645 captured using a DeltaVision Elite Imaging System (GE Health Sciences, USA) or Leica DM5500B  
646 microscope (Leica, Germany), as indicated.

647

648 Imaging of live cells expressing SM or cholesterol reporters was performed using a Zeiss Cell  
649 Observer Spinning Disc Confocal Microscope equipped with a TempModule S1 temperature control  
650 unit, a Yokogawa Spinning Disc CSU-X1a 5000 Unit, a Evolve EMCDD camera (Photonics, Tucson),

651 a motorized xyz-stage PZ-2000 XYZ (Applied Scientific Instrumentation) and an Alpha Plan-  
652 Apochromat x 63 (NA 1.46) oil immersion objective. The following filter combinations were used: blue  
653 emission with BP 445/50, green emission with BP 525/50, orange emission BP 605/70. All images  
654 were acquired using Zeiss Zen 2012 acquisition software. For hypotonic swelling, U2OS cells or  
655 fibroblasts were seeded in a  $\mu$ -Slide 8 well glass bottom chamber (Ibidi; 80827) and transfected with  
656 indicated expression constructs. At 16h post-transfection, cells were imaged in isotonic medium  
657 (100% Opti-MEM) or after 5 min incubation in hypotonic medium (1% Opti-MEM in H<sub>2</sub>O) at 37°C. For  
658 cholesterol localization experiments, cells transfected with D4H-mCherry were incubated for 16 h in  
659 growth medium containing 70  $\mu$ g/ml 10kDa dextran conjugated with Alexa Fluor 647 (Thermo Fisher  
660 Scientific, D22914). Growth medium was replaced with Opti-MEM 2 h prior to imaging. Images were  
661 deconvoluted using Huygens deconvolution (SVI, The Netherlands) and processed using Fiji software  
662 (NIH, USA).

663

664 Ratiometric confocal imaging of cells stained with Nile Red-based solvatochromic probes (NR12A,  
665 NRER<sub>Cl</sub>) was performed on a Zeiss LSM 880 with an AiryScan module using a 63X 1.4 NA oil  
666 immersion objective. Excitation was provided by a 532 nm laser and fluorescence emission was  
667 detected at two spectral ranges: 500–600 (I500–600) and 600–700 nm (I600–700). The images were  
668 processed with a home-made program under LabView, which generates a ratiometric image by  
669 dividing the image of the I500–600 channel by that of the I600–700 channel, as described in (Darwich  
670 et al., 2013). For each pixel, a pseudo-color scale was used for coding the ratio, while the intensity  
671 was defined by the integral intensity recorded for both channels at the corresponding pixel. For  
672 staining with the NR12A probe, cells were washed with PBS and incubated in Opti-MEM containing  
673 0.2  $\mu$ M NR12A for 10 min at RT. For staining with the NRER<sub>Cl</sub> probe, cells were washed with PBS and  
674 incubated in Opti-MEM containing 0.2  $\mu$ M NRER<sub>Cl</sub> for 30 min at 37°C. Subsequently, cells were  
675 washed 3 times with PBS and imaged in Opti-MEM.

676

#### 677 **Cytotoxicity assay**

678 Cells were seeded in 96-well plate (Greiner Bio-One; 655101) at 10,000 cells per well in DMEM  
679 supplemented with 10% FBS. After 24 h, the medium was replaced with Opti-MEM, and 24 h later  
680 m $\beta$ CD was added at the indicated concentrations. After 1 h, PrestoBlue HS (Thermo Fisher Scientific;  
681 P50200) was added to the well to a final concentration of 10% (v/v) and incubated for 3.5 h at 37°C.  
682 Next, absorbance at 570 nm was measured with 600 nm as reference wavelength using an Infinite  
683 200 Pro M-Plex plate reader (Tecan Lifesciences). Measurements were average of quadruplicates.  
684 To calculate relative percentage of cell survival, the measured value for each well (x) was subtracted  
685 by the minimum measured value (min) and divided by the subtrahend of the average measured value  
686 of untreated cells (untreated) and the minimum measured value (min);  $((x-\text{min})/(\text{untreated}-\text{min}) * 100)$ .

687

#### 688 **Cell surface staining with EqtSM**

689 For production of recombinant FLAG-tagged EqtSM, *E. coli* BL21 (DE3) transformed with pET28a-  
690 EQ-SM-3xFLAG was grown at 37°C to early exponential phase in LB medium containing 100  $\mu$ g/ml

691 ampicillin prior to addition of 0.4 mM isopropyl  $\beta$ -D-1-thiogalactopyranoside. After 5 h induction,  
692 bacteria were mechanically lysed in 20 mM  $\text{Na}_2\text{HPO}_4/\text{NaH}_2\text{PO}_4$ , pH 7.4, 500 mM NaCl, and 25 mM  
693 imidazole supplemented with PIC by microtip sonication. Bacterial lysates were cleared by  
694 centrifugation at 10,000 g for 20 min at 4°C and applied to a HisTrap HP column using an AKTA  
695 Prime protein purification system (GE Healthcare, Life Sciences). Bound protein was eluted with a  
696 linear imidazole gradient. HeLa cells grown on glass coverslips were incubated with 1  $\mu\text{M}$  of purified  
697 FLAG-EqtSM in Labeling Buffer (20 mM  $\text{Na}_2\text{HPO}_4/\text{NaH}_2\text{PO}_4$ , pH 7.4, 500 mM NaCl) for 2 min at RT,  
698 washed with PBS, and then fixed in 4% PFA for 15 min at RT. After quenching in 50 mM ammonium  
699 chloride, cells were immunostained with polyclonal rabbit anti-FLAG antibody at 4°C for 10 min and  
700 Cy2-conjugated anti-rabbit antibody at RT for 30 min in PBS supplemented with 1% BSA. For flow  
701 cytometry, HeLa cells were trypsinized, resuspended in medium containing 10% FCS, washed and  
702 then incubated with 1  $\mu\text{M}$  Eqt-FLAG at RT for 2 min in Labeling Buffer. Next, cells were incubated with  
703 anti-FLAG antibody for 10 min at 4°C in PBS containing 1% BSA, washed, and then fixed in 4% PFA  
704 for 15 min at RT. After quenching in 50 mM ammonium chloride, cells were incubated with Cy2-  
705 conjugated anti-rabbit antibody for 45 min in PBS containing 1% BSA, washed, and subjected to flow  
706 cytometry using a SH800 Cell Sorter (Sony Biotechnology). Flow cytometry data were analysed using  
707 Sony Cell Sorter software version 2.1.5.

708

#### 709 **LC-MS/MS lipidomics**

710 Cells were incubated for 24h in Opti-MEM reduced serum medium in the absence or presence of  
711 1 $\mu\text{g}/\text{ml}$  doxycycline. Next, cells were harvested in homogenization buffer (15 mM KCl, 5 mM NaCl, 20  
712 mM HEPES/KOH pH 7.2, 10% glycerol, 1x PIC) using a sonifier BRANSON 250. The protein in crude  
713 homogenates was determined by Bradford protein assay (BioRad, USA) and 50  $\mu\text{g}$  of protein was  
714 used for a subsequent chloroform/methanol extraction. To normalize lipid concentration of lipids in the  
715 samples, homogenates were prior to the extraction spiked with lipid standards ceramide (Cer  
716 18:1/17:0) and sphingomyelin (SM 18:1/17:0). Dried lipid extracts were dissolved in a 50:50 mixture of  
717 mobile phase A (60:40 water/acetonitrile, including 10 mM ammonium formate and 0.1% formic acid)  
718 and mobile phase B (88:10:2 2-propanol/acetonitrile/ $\text{H}_2\text{O}$ , including 2 mM ammonium formate and  
719 0.02% formic acid). HPLC analysis was performed on a C30 reverse-phase column (Thermo Acclaim  
720 C30, 2.1  $\times$  250 mm, 3  $\mu\text{m}$ , operated at 50°C; Thermo Fisher Scientific) connected to an HP 1100  
721 series HPLC system (Agilent) and a QExactivePLUS Orbitrap mass spectrometer (Thermo Fisher  
722 Scientific) equipped with a heated electrospray ionization (HESI) probe. MS analysis was performed  
723 as described previously (Eising et al., 2019). Briefly, elution was performed with a gradient of 45 min;  
724 during the first 3 min, elution started with 40% of phase B and increased to 100% in a linear gradient  
725 over 23 mins. 100% of B was maintained for 3 min. Afterwards, solvent B was decreased to 40% and  
726 maintained for another 15 min for column re-equilibration. MS spectra of lipids were acquired in full-  
727 scan/data-dependent MS2 mode. The maximum injection time for full scans was 100 ms, with a target  
728 value of 3,000,000 at a resolution of 70,000 at  $m/z$  200 and a mass range of 200–2000  $m/z$  in both  
729 positive and negative mode. The 10 most intense ions from the survey scan were selected and  
730 fragmented with HCD with a normalized collision energy of 30. Target values for MS/MS were set at

731 100,000 with a maximum injection time of 50 ms at a resolution of 17,500 at m/z of 200. Peaks were  
732 analyzed using the Lipid Search algorithm (MKI, Tokyo, Japan). Peaks were defined through raw files,  
733 product ion and precursor ion accurate masses. Candidate molecular species were identified by  
734 database (>1,000,000 entries) search of positive (+H<sup>+</sup>; +NH<sub>4</sub><sup>+</sup>) or negative ion adducts (-H<sup>-</sup>; +COOH<sup>-</sup>).  
735 Mass tolerance was set to 5 ppm for the precursor mass. Samples were aligned within a time window  
736 and results combined in a single report. From the intensities of lipid standards and lipid classes used,  
737 absolute values for each lipid in pmol/mg protein were calculated. Data are reported as mol% of total  
738 phospholipids measured.

739

#### 740 **Organelle purification and shot-gun lipid mass spectrometry**

741 *Affinity purification.* 10 million cells were seeded in 15 cm dishes and cultured for 24 h in Opti-MEM  
742 reduced serum medium containing 1 µg/ml doxycycline. For ER purifications, cells were washed once  
743 in ice-cold PBS. For PM purification, cells were washed three times with ice-cold PBS and then  
744 incubated for 30 min at 4°C in PBS containing 1 mg/ml EZ-Link-sulfo-NHS-LC-LC-Biotin (Thermo  
745 Fisher Scientific). Next, cells were washed three times with ice-cold PBS. Biotin-treated and untreated  
746 cells were scraped in ice-cold PBS, centrifuged once at 500 x g, and then twice at 1,000 x g for 5 min,  
747 4°C. All steps from here were performed on ice or at 4°C. Cell pellets were re-suspended in ice-cold  
748 10 ml SuMa buffer [10 mM Hepes, 0.21 M mannitol, 0.070 M Sucrose, pH 7.5]. After the third  
749 centrifugation step, cells were resuspended in 1 ml SuMa4 buffer [SuMa buffer supplemented with 0.5  
750 mM DTT, 0.5 % fatty acid-free BSA (Sigma Aldrich), 25 units/ml Benzonase (Sigma Aldrich) and 1x  
751 cOmplete™ Mini, EDTA-free Protease Inhibitor Cocktail (Roche Diagnostics) and lysed by passages  
752 through a Balch homogenizer 20 times. The cell lysates were subsequently centrifuged at 1,500 x g  
753 for 10 min and again for 15 min to prepare the light membrane fractions (LMFs). For ER purification,  
754 LMFs were incubated with rabbit anti-calnexin polyclonal antibody (Abcam) and subsequently with  
755 anti-rabbit IgG MicroBeads (Miltenyi Biotec), and for the PM purification, only with Streptavidin  
756 MicroBeads (Miltenyi Biotec). The LMFs were then loaded into MS Columns (Miltenyi Biotec) mounted  
757 on a magnetic stand (Miltenyi Biotec) and pre-equilibrated in SuMa4 buffer. The columns were  
758 washed three times with 500 µl SuMa4 buffer and twice with 500 µl SuMa2 buffer (SuMa4 without  
759 Benzonase and PIC). Thereafter, columns were removed from the magnetic stand and elution was  
760 performed with 600 µl SuMa2 buffer. Eluate samples were equally divided for western blotting and  
761 lipidomics. All samples were centrifuged at 21,100 x g for 20 min and supernatants were discarded.  
762 Pellets were resuspended in 200 µl SuMa+ buffer (SuMa2 without BSA) and the centrifugation was  
763 repeated. Lipidomics samples were stored at -80°C until analysis and immunoblot samples were  
764 dissolved in 2x Laemmli Sample Buffer containing 100 mM DTT and stored at -20 °C until processing.

765

766 *Lipid extraction.* Lipid extraction was performed as previously described (Nielsen et al., 2020), with  
767 some modifications. Briefly, samples in 200 µl 155 mM ammonium bicarbonate were mixed with 24 µl  
768 internal lipid standard mix (Nielsen et al., 2020) and 976 µl chloroform:methanol 2:1 (v/v). The  
769 samples were shaken in a thermomixer at 2,000 rpm and 4°C for 15 min and centrifuged for 2 min at  
770 2,000 x g and 4°C. Then, the lower phase containing lipids was washed twice with 100 µl methanol

771 and 50  $\mu$ l 155 mM ammonium bicarbonate. Lower phase was then transferred to new tubes and dried  
772 in a vacuum centrifuge for 75 min, and the dried lipids were resuspended in 100  $\mu$ l  
773 chloroform:methanol 1:2 (v:v).

774

775 *Mass spectrometry.* Shotgun lipidomics was performed as previously described (Nielsen et al., 2020).  
776 Lipid extracts (10  $\mu$ l) were loaded in a 96 well plate and mixed with either 12.9  $\mu$ l positive ionization  
777 solvent (13.3 mM ammonium acetate in propan-2-ol) or 10  $\mu$ l negative ionization solvent (0.2 % (v/v)  
778 triethyl amine in chloroform:methanol 1:5 (v/v)). The samples were analyzed in the negative and  
779 positive ionization modes using Q Exactive Hybrid Quadrupole-Orbitrap mass spectrometer (Thermo  
780 Fisher Scientific, Waltham, MA) coupled to TriVersa NanoMate (Advion Biosciences, Ithaca, NY,  
781 USA). Data are reported as mol% of total lipids measured.

782

783

## 784 **ACKNOWLEDGEMENTS**

785

786 We gratefully acknowledge Gregory Fairn, Benjamin Glick and Christoph Thiele for providing DNA  
787 constructs and chemicals, Florian Fröhlich and Stefan Walter for technical assistance with LC-MS/MS,  
788 and Rainer Kurre for technical assistance with live cell microscopy. This work was supported by the  
789 Deutsche Forschungsgemeinschaft (SFB944-P14 and HO3539/1-1 to J.C.M.H.; SFB944-P8 to J.Pi.)  
790 and the National Institute of General Medical Sciences of the United States National Institutes of  
791 Health (award R35 GM144096 to C. G. B.). The authors declare no competing interests.

792

793

## 794 **AUTHOR CONTRIBUTIONS**

795

796 T.S., J.Pa. and J.C.M.H. designed the research plan and wrote the manuscript; T.S. and J.Pa.  
797 performed the bulk of experiments and analyzed the results, with critical input from M.B. and A.H.;  
798 D.I.D. and A.S.K. provided Nile Red-based solvatochromic probes and critical expertise on their use;  
799 B.S. performed the experiments with Nile Red-based solvatochromic probes, with critical input from  
800 T.S., M.P. and J.Pi.; L.D.B. and P.A.T. provided patient-derived fibroblasts; O.M. provided patient-  
801 relevant expertise and helped to interpret experimental data; Y.K. and C.G.B. designed and  
802 characterized the Eqt-based SM reporters; M.M.F. and K.M. performed shotgun lipidomics on isolated  
803 organelles; all authors discussed results and commented on the manuscript.

804

805

## 806 **REFERENCES**

807

808 Alonso, A., and F.M. Goñi. 2018. The Physical Properties of Ceramides in Membranes. *Annu. Rev.*  
809 *Biophys.* 47:633–654. doi:10.1146/annurev-biophys-070317-033309.

810 Aubin, I., C.P. Adams, S. Opsahl, D. Septier, C.E. Bishop, N. Auge, R. Salvayre, A. Negre-Salvayre,

- 811 M. Goldberg, J.-L. Guénet, and C. Poirier. 2005. A deletion in the gene encoding sphingomyelin  
812 phosphodiesterase 3 (*Smpd3*) results in osteogenesis and dentinogenesis imperfecta in the  
813 mouse. *Nat. Genet.* 37:803–5. doi:10.1038/ng1603.
- 814 Bhattacharyya, D., and B.S. Glick. 2007. Two Mammalian Sec16 Homologues Have Nonredundant  
815 Functions in Endoplasmic Reticulum (ER) Export and Transitional ER Organization. *Mol. Biol.*  
816 *Cell.* 18:839–849. doi:10.1091/mbc.e06-08-0707.
- 817 Bigay, J., and B. Antony. 2012. Curvature, lipid packing, and electrostatics of membrane organelles:  
818 defining cellular territories in determining specificity. *Dev. Cell.* 23:886–95.  
819 doi:10.1016/j.devcel.2012.10.009.
- 820 Boyadjiev, S.A., J.C. Fromme, J. Ben, S.S. Chong, C. Nauta, D.J. Hur, G. Zhang, S. Hamamoto, R.  
821 Schekman, M. Ravazzola, L. Orci, and W. Eyaid. 2006. Cranio-lenticulo-sutural dysplasia is  
822 caused by a SEC23A mutation leading to abnormal endoplasmic-reticulum-to-Golgi trafficking.  
823 *Nat. Genet.* 38:1192–7. doi:10.1038/ng1876.
- 824 Brügger, B., R. Sandhoff, S. Wegehingel, K. Gorgas, J. Malsam, J.B. Helms, W.D. Lehmann, W.  
825 Nickel, and F.T. Wieland. 2000. Evidence for segregation of sphingomyelin and cholesterol  
826 during formation of COPI-coated vesicles. *J. Cell Biol.* 151:507–18. doi:10.1083/jcb.151.3.507.
- 827 Buton, X., P. Hervé, J. Kubelt, A. Tannert, K.N.J. Burger, P. Fellmann, P. Müller, A. Herrmann, M.  
828 Seigneuret, and P.F. Devaux. 2002. Transbilayer movement of monohexosylsphingolipids in  
829 endoplasmic reticulum and Golgi membranes. *Biochemistry.* 41:13106–15.  
830 doi:10.1021/bi020385t.
- 831 Chalal, M., I. Menon, Z. Turan, and A.K. Menon. 2012. Reconstitution of glucosylceramide flip-flop  
832 across endoplasmic reticulum: implications for mechanism of glycosphingolipid biosynthesis. *J.*  
833 *Biol. Chem.* 287:15523–32. doi:10.1074/jbc.M112.343038.
- 834 Chung, J., F. Torta, K. Masai, L. Lucast, H. Czapla, L.B. Tanner, P. Narayanaswamy, M.R. Wenk, F.  
835 Nakatsu, and P. De Camilli. 2015. INTRACELLULAR TRANSPORT. PI4P/phosphatidylserine  
836 countertransport at ORP5- and ORP8-mediated ER-plasma membrane contacts. *Science.*  
837 349:428–32. doi:10.1126/science.aab1370.
- 838 Danylchuk, D.I., P.-H. Jouard, and A.S. Klymchenko. 2021. Targeted Solvatochromic Fluorescent  
839 Probes for Imaging Lipid Order in Organelles under Oxidative and Mechanical Stress. *J. Am.*  
840 *Chem. Soc.* 143:912–924. doi:10.1021/jacs.0c10972.
- 841 Danylchuk, D.I., S. Moon, K. Xu, and A.S. Klymchenko. 2019. Switchable Solvatochromic Probes for  
842 Live-Cell Super-resolution Imaging of Plasma Membrane Organization. *Angew. Chem. Int. Ed.*  
843 *Engl.* 58:14920–14924. doi:10.1002/anie.201907690.
- 844 Darwich, Z., O.A. Kucherak, R. Kreder, L. Richert, R. Vauchelles, Y. Mély, and A.S. Klymchenko.  
845 2013. Rational design of fluorescent membrane probes for apoptosis based on 3-  
846 hydroxyflavone. *Methods Appl. Fluoresc.* 1:025002. doi:10.1088/2050-6120/1/2/025002.
- 847 Das, A., M.S. Brown, D.D. Anderson, J.L. Goldstein, and A. Radhakrishnan. 2014. Three pools of  
848 plasma membrane cholesterol and their relation to cholesterol homeostasis. *Elife.* 3.  
849 doi:10.7554/eLife.02882.
- 850 Deng, Y., F.E. Rivera-Molina, D.K. Toomre, and C.G. Burd. 2016. Sphingomyelin is sorted at the

- 851 trans Golgi network into a distinct class of secretory vesicle. *Proc. Natl. Acad. Sci. U. S. A.*  
852 113:6677–82. doi:10.1073/pnas.1602875113.
- 853 Ehlen, H.W.A., M. Chinenkova, M. Moser, H.-M. Munter, Y. Krause, S. Gross, B. Brachvogel, M.  
854 Wuelling, U. Kornak, and A. Vortkamp. 2013. Inactivation of anoctamin-6/Tmem16f, a regulator  
855 of phosphatidylserine scrambling in osteoblasts, leads to decreased mineral deposition in  
856 skeletal tissues. *J. Bone Miner. Res.* 28:246–59. doi:10.1002/jbmr.1751.
- 857 Eising, S., L. Thiele, and F. Fröhlich. 2019. A systematic approach to identify recycling endocytic  
858 cargo depending on the GARP complex. *Elife.* 8. doi:10.7554/eLife.42837.
- 859 Ellison, C.J., W. Kukulski, K.B. Boyle, S. Munro, and F. Randow. 2020. Transbilayer Movement of  
860 Sphingomyelin Precedes Catastrophic Breakage of Enterobacteria-Containing Vacuoles. *Curr.*  
861 *Biol.* 30:2974-2983.e6. doi:10.1016/j.cub.2020.05.083.
- 862 Endapally, S., D. Frias, M. Grzemska, A. Gay, D.R. Tomchick, and A. Radhakrishnan. 2019.  
863 Molecular Discrimination between Two Conformations of Sphingomyelin in Plasma Membranes.  
864 *Cell.* 176:1040-1053.e17. doi:10.1016/j.cell.2018.12.042.
- 865 Fukasawa, M., M. Nishijima, H. Itabe, T. Takano, and K. Hanada. 2000. Reduction of sphingomyelin  
866 level without accumulation of ceramide in Chinese hamster ovary cells affects detergent-  
867 resistant membrane domains and enhances cellular cholesterol efflux to methyl-beta -  
868 cyclodextrin. *J. Biol. Chem.* 275:34028–34. doi:10.1074/jbc.M005151200.
- 869 Garbes, L., K. Kim, A. Rieß, H. Hoyer-Kuhn, F. Beleggia, A. Bevot, M.J. Kim, Y.H. Huh, H.-S. Kweon,  
870 R. Savarirayan, D. Amor, P.M. Kakadia, T. Lindig, K.O. Kagan, J. Becker, S.A. Boyadjiev, B.  
871 Wollnik, O. Semler, S.K. Bohlander, J. Kim, and C. Netzer. 2015. Mutations in SEC24D,  
872 encoding a component of the COPII machinery, cause a syndromic form of osteogenesis  
873 imperfecta. *Am. J. Hum. Genet.* 96:432–9. doi:10.1016/j.ajhg.2015.01.002.
- 874 Ghanbarpour, A., D.P. Valverde, T.J. Melia, and K.M. Reinisch. 2021. A model for a partnership of  
875 lipid transfer proteins and scramblases in membrane expansion and organelle biogenesis. *Proc.*  
876 *Natl. Acad. Sci. U. S. A.* 118. doi:10.1073/pnas.2101562118.
- 877 Granada, M.H., P. Gangoiti, A. Ouro, L. Arana, and A. Gómez-Muñoz. 2009. Ceramide 1-phosphate  
878 inhibits serine palmitoyltransferase and blocks apoptosis in alveolar macrophages. *Biochim.*  
879 *Biophys. Acta.* 1791:263–72. doi:10.1016/j.bbali.2009.01.023.
- 880 Guillemin, B., S. Nampoothiri, D. Syx, F. Malfait, and S. Symoens. 2021. Loss of TANGO1 Leads to  
881 Absence of Bone Mineralization. *JBMR plus.* 5:e10451. doi:10.1002/jbm4.10451.
- 882 Hanada, K., K. Kumagai, S. Yasuda, Y. Miura, M. Kawano, M. Fukasawa, and M. Nishijima. 2003.  
883 Molecular machinery for non-vesicular trafficking of ceramide. *Nature.* 426:803–9.  
884 doi:10.1038/nature02188.
- 885 Holthuis, J.C.M., and A.K. Menon. 2014. Lipid landscapes and pipelines in membrane homeostasis.  
886 *Nature.* 510. doi:10.1038/nature13474.
- 887 Huang, D., B. Xu, L. Liu, L. Wu, Y. Zhu, A. Ghanbarpour, Y. Wang, F.-J. Chen, J. Lyu, Y. Hu, Y.  
888 Kang, W. Zhou, X. Wang, W. Ding, X. Li, Z. Jiang, J. Chen, X. Zhang, H. Zhou, J.Z. Li, C. Guo,  
889 W. Zheng, X. Zhang, P. Li, T. Melia, K. Reinisch, and X.-W. Chen. 2021. TMEM41B acts as an  
890 ER scramblase required for lipoprotein biogenesis and lipid homeostasis. *Cell Metab.* 33:1655-

- 891 1670.e8. doi:10.1016/j.cmet.2021.05.006.
- 892 Huitema, K., J. Van Den Dikkenberg, J.F.H.M. Brouwers, and J.C.M. Holthuis. 2004. Identification of a  
893 family of animal sphingomyelin synthases. *EMBO J.* 23. doi:10.1038/sj.emboj.7600034.
- 894 Jain, A., O. Beutel, K. Ebell, S. Korneev, and J.C.M. Holthuis. 2017. Diverting CERT-mediated  
895 ceramide transport to mitochondria triggers Bax-dependent apoptosis. *J. Cell Sci.* 130.  
896 doi:10.1242/jcs.194191.
- 897 Kim, Y.-J., P. Greimel, and Y. Hirabayashi. 2018. GPRC5B-Mediated Sphingomyelin Synthase 2  
898 Phosphorylation Plays a Critical Role in Insulin Resistance. *iScience.* 8:250–266.  
899 doi:10.1016/j.isci.2018.10.001.
- 900 King, C., P. Sengupta, A.Y. Seo, and J. Lippincott-Schwartz. 2020. ER membranes exhibit phase  
901 behavior at sites of organelle contact. *Proc. Natl. Acad. Sci. U. S. A.* 117:7225–7235.  
902 doi:10.1073/pnas.1910854117.
- 903 Lamour, N.F., P. Subramanian, D.S. Wijesinghe, R. V Stahelin, J. V Bonventre, and C.E. Chalfant.  
904 2009. Ceramide 1-phosphate is required for the translocation of group IVA cytosolic  
905 phospholipase A2 and prostaglandin synthesis. *J. Biol. Chem.* 284:26897–907.  
906 doi:10.1074/jbc.M109.001677.
- 907 Levental, K.R., E. Malmberg, J.L. Symons, Y.-Y. Fan, R.S. Chapkin, R. Ernst, and I. Levental. 2020.  
908 Lipidomic and biophysical homeostasis of mammalian membranes counteracts dietary lipid  
909 perturbations to maintain cellular fitness. *Nat. Commun.* 11:1339. doi:10.1038/s41467-020-  
910 15203-1.
- 911 Li, Z., H. Zhang, J. Liu, C.-P. Liang, Y. Li, Y. Li, G. Teitelman, T. Beyer, H.H. Bui, D.A. Peake, Y.  
912 Zhang, P.E. Sanders, M.-S. Kuo, T.-S. Park, G. Cao, and X.-C. Jiang. 2011. Reducing plasma  
913 membrane sphingomyelin increases insulin sensitivity. *Mol. Cell. Biol.* 31:4205–18.  
914 doi:10.1128/MCB.05893-11.
- 915 Maekawa, M., and G.D. Fairn. 2015. Complementary probes reveal that phosphatidylserine is  
916 required for the proper transbilayer distribution of cholesterol. *J. Cell Sci.* 128:1422–33.  
917 doi:10.1242/jcs.164715.
- 918 Magdeleine, M., R. Gautier, P. Gounon, H. Barelli, S. Vanni, and B. Antonny. 2016. A filter at the  
919 entrance of the Golgi that selects vesicles according to size and bulk lipid composition. *Elife.* 5.  
920 doi:10.7554/eLife.16988.
- 921 van Meer, G., D.R. Voelker, and G.W. Feigenson. 2008. Membrane lipids: where they are and how  
922 they behave. *Nat. Rev. Mol. Cell Biol.* 9:112–24. doi:10.1038/nrm2330.
- 923 Mesmin, B., J. Bigay, J. Moser von Filseck, S. Lacas-Gervais, G. Drin, and B. Antonny. 2013. A four-  
924 step cycle driven by PI(4)P hydrolysis directs sterol/PI(4)P exchange by the ER-Golgi tether  
925 OSBP. *Cell.* 155:830–43. doi:10.1016/j.cell.2013.09.056.
- 926 Mesmin, B., J. Bigay, J. Polidori, D. Jamecna, S. Lacas-Gervais, and B. Antonny. 2017. Sterol  
927 transfer, PI4P consumption, and control of membrane lipid order by endogenous OSBP. *EMBO*  
928 *J.* 36:3156–3174. doi:10.15252/embj.201796687.
- 929 Mitsutake, S., K. Zama, H. Yokota, T. Yoshida, M. Tanaka, M. Mitsui, M. Ikawa, M. Okabe, Y. Tanaka,  
930 T. Yamashita, H. Takemoto, T. Okazaki, K. Watanabe, and Y. Igarashi. 2011. Dynamic



- 931 modification of sphingomyelin in lipid microdomains controls development of obesity, fatty liver,  
932 and type 2 diabetes. *J. Biol. Chem.* 286:28544–55. doi:10.1074/jbc.M111.255646.
- 933 Moser von Filseck, J., A. Čopič, V. Delfosse, S. Vanni, C.L. Jackson, W. Bourguet, and G. Drin. 2015.  
934 INTRACELLULAR TRANSPORT. Phosphatidylserine transport by ORP/Osh proteins is driven  
935 by phosphatidylinositol 4-phosphate. *Science.* 349:432–6. doi:10.1126/science.aab1346.
- 936 Munro, S. 1995. An investigation of the role of transmembrane domains in Golgi protein retention.  
937 *EMBO J.* 14:4695–704.
- 938 Murakami, C., and F. Sakane. 2021. Sphingomyelin synthase-related protein generates diacylglycerol  
939 via the hydrolysis of glycerophospholipids in the absence of ceramide. *J. Biol. Chem.*  
940 296:100454. doi:10.1016/j.jbc.2021.100454.
- 941 Murshed, M. 2018. Mechanism of Bone Mineralization. *Cold Spring Harb. Perspect. Med.* 8.  
942 doi:10.1101/cshperspect.a031229.
- 943 Niekamp, P., F. Scharte, T. Sokoya, L. Vittadello, Y. Kim, Y. Deng, E. Südhoff, A. Hilderink, M. Imlau,  
944 C. J. Clarke, M. Hensel, C. G. Burd, and J. C. M. Holthuis. 2022. Ca<sup>2+</sup>-activated sphingomyelin  
945 scrambling and turnover mediate ESCRT-independent lysosomal repair. *Nature Commun.* In  
946 press. doi: 10.1038/s41467-022-29481-4
- 947 Nielsen, I.Ø., A. Vidas Olsen, J. Dicroce-Giacobini, E. Papaleo, K.K. Andersen, M. Jäättelä, K.  
948 Maeda, and M. Bilgin. 2020. Comprehensive Evaluation of a Quantitative Shotgun Lipidomics  
949 Platform for Mammalian Sample Analysis on a High-Resolution Mass Spectrometer. *J. Am. Soc.*  
950 *Mass Spectrom.* 31:894–907. doi:10.1021/jasms.9b00136.
- 951 Nilsson, I., H. Ohvo-Rekilä, J.P. Slotte, A.E. Johnson, and G. von Heijne. 2001. Inhibition of protein  
952 translocation across the endoplasmic reticulum membrane by sterols. *J. Biol. Chem.*  
953 276:41748–54. doi:10.1074/jbc.M105823200.
- 954 Di Paolo, G., and P. De Camilli. 2006. Phosphoinositides in cell regulation and membrane dynamics.  
955 *Nature.* 443:651–7. doi:10.1038/nature05185.
- 956 Pekkinen, M., P.A. Terhal, L.D. Botto, P. Henning, R.E. Mäkitie, P. Roschger, A. Jain, M. Kol, M.A.  
957 Kjellberg, E.P. Paschalis, K. van Gassen, M. Murray, P. Bayrak-Toydemir, M.K. Magnusson, J.  
958 Jans, M. Kausar, J.C. Carey, P. Somerharju, U.H. Lerner, V.M. Olkkonen, K. Klaushofer, J.C.M.  
959 Holthuis, and O. Mäkitie. 2019. Osteoporosis and skeletal dysplasia caused by pathogenic  
960 variants in SGMS2. *JCI Insight.* doi:10.1172/jci.insight.126180.
- 961 Pomorski, T.G., and A.K. Menon. 2016. Lipid somersaults: Uncovering the mechanisms of protein-  
962 mediated lipid flipping. *Prog. Lipid Res.* 64:69–84. doi:10.1016/j.plipres.2016.08.003.
- 963 Presa, N., A. Gomez-Larrauri, A. Dominguez-Herrera, M. Trueba, and A. Gomez-Muñoz. 2020. Novel  
964 signaling aspects of ceramide 1-phosphate. *Biochim. Biophys. acta. Mol. cell Biol. lipids.*  
965 1865:158630. doi:10.1016/j.bbalip.2020.158630.
- 966 Quiroga, R., A. Trenchi, A. González Montoro, J. Valdez Taubas, and H.J.F. Maccioni. 2013. Short  
967 transmembrane domains with high-volume exoplasmic halves determine retention of Type II  
968 membrane proteins in the Golgi complex. *J. Cell Sci.* 126:5344–9. doi:10.1242/jcs.130658.
- 969 Radanović, T., J. Reinhard, S. Ballweg, K. Pesek, and R. Ernst. 2018. An Emerging Group of  
970 Membrane Property Sensors Controls the Physical State of Organellar Membranes to Maintain

- 971 Their Identity. *Bioessays*. 40:e1700250. doi:10.1002/bies.201700250.
- 972 Roux, A., D. Cuvelier, P. Nassoy, J. Prost, P. Bassereau, and B. Goud. 2005. Role of curvature and  
973 phase transition in lipid sorting and fission of membrane tubules. *EMBO J.* 24:1537–45.  
974 doi:10.1038/sj.emboj.7600631.
- 975 Sharpe, H.J., T.J. Stevens, and S. Munro. 2010. A comprehensive comparison of transmembrane  
976 domains reveals organelle-specific properties. *Cell*. 142:158–69. doi:10.1016/j.cell.2010.05.037.
- 977 Slotte, J.P. 2013. Biological functions of sphingomyelins. *Prog. Lipid Res.* 52:424–37.  
978 doi:10.1016/j.plipres.2013.05.001.
- 979 Spandl, J., D.J. White, J. Peychl, and C. Thiele. 2009. Live cell multicolor imaging of lipid droplets with  
980 a new dye, LD540. *Traffic*. 10:1579–84. doi:10.1111/j.1600-0854.2009.00980.x.
- 981 Sugimoto, M., Y. Shimizu, S. Zhao, N. Ukon, K. Nishijima, M. Wakabayashi, T. Yoshioka, K.  
982 Higashino, Y. Numata, T. Okuda, N. Tamaki, H. Hanamatsu, Y. Igarashi, and Y. Kuge. 2016.  
983 Characterization of the role of sphingomyelin synthase 2 in glucose metabolism in whole-body  
984 and peripheral tissues in mice. *Biochim. Biophys. Acta*. 1861:688–702.  
985 doi:10.1016/j.bbaliip.2016.04.019.
- 986 Vacaru, A.M., F.G. Tafesse, P. Ternes, V. Kondylis, M. Hermansson, J.F.H.M. Brouwers, P.  
987 Somerharju, C. Rabouille, and J.C.M. Holthuis. 2009. Sphingomyelin synthase-related protein  
988 SMSr controls ceramide homeostasis in the ER. *J. Cell Biol.* 185:1013–1027.  
989 doi:10.1083/jcb.200903152.
- 990 Wong, L.H., A.T. Gatta, and T.P. Levine. 2019. Lipid transfer proteins: the lipid commute via shuttles,  
991 bridges and tubes. *Nat. Rev. Mol. Cell Biol.* 20:85–101. doi:10.1038/s41580-018-0071-5.
- 992 Yano, M., K. Watanabe, T. Yamamoto, K. Ikeda, T. Senokuchi, M. Lu, T. Kadomatsu, H. Tsukano, M.  
993 Ikawa, M. Okabe, S. Yamaoka, T. Okazaki, H. Umehara, T. Gotoh, W.-J. Song, K. Node, R.  
994 Taguchi, K. Yamagata, and Y. Oike. 2011. Mitochondrial dysfunction and increased reactive  
995 oxygen species impair insulin secretion in sphingomyelin synthase 1-null mice. *J. Biol. Chem.*  
996 286:3992–4002. doi:10.1074/jbc.M110.179176.
- 997 Yano, M., T. Yamamoto, N. Nishimura, T. Gotoh, K. Watanabe, K. Ikeda, Y. Garan, R. Taguchi, K.  
998 Node, T. Okazaki, and Y. Oike. 2013. Increased oxidative stress impairs adipose tissue function  
999 in sphingomyelin synthase 1 null mice. *PLoS One*. 8:e61380. doi:10.1371/journal.pone.0061380.
- 1000 Zhou, Y., and J.F. Hancock. 2018. Deciphering lipid codes: K-Ras as a paradigm. *Traffic*. 19:157–  
1001 165. doi:10.1111/tra.12541.
- 1002
- 1003
- 1004

1005 **FIGURE LEGENDS**

1006

1007 **Fig. 1. SMS2 contains an autonomous ER export signal**

1008 (a) Membrane topology of SMS family members and chimeric protein SMSr/2<sub>11-77</sub>. Active site residues  
1009 are marked in red. The position of a conserved IXMP sequence motif is marked by an arrow. (b)  
1010 Sequence alignment of the region immediately upstream of the first membrane span (TM1) in  
1011 vertebrate SMS family members. Note that human SMS2 residues Ile62 and Met64 are part of the  
1012 IXMP sequence motif, which is conserved in SMS1 and SMS2, but not SMSr, across different  
1013 vertebrate species. (c) HeLa cells transfected with empty vector (EV) or FLAG-tagged SMS2,  
1014 SMS2<sup>I62S</sup> or SMS2<sup>M64R</sup> were fixed, immunostained with  $\alpha$ -FLAG (*green*) and  $\alpha$ -calnexin (*magenta*)  
1015 antibodies, counterstained with DAPI (*blue*) and imaged by DeltaVision microscopy. (d) HeLa cells  
1016 transfected with FLAG-tagged SMSr, SMSr/2<sub>11-77</sub>, SMSr/2<sub>11-77</sub><sup>I62S</sup> or SMSr/2<sub>11-77</sub><sup>M64R</sup> were fixed,  
1017 immunostained with  $\alpha$ -FLAG (*green*) and  $\alpha$ -calnexin (*magenta*) antibodies, counterstained with DAPI  
1018 (*blue*) and imaged by DeltaVision microscopy. Scale bar, 10  $\mu$ m.

1019

1020 **Fig. 2. Pathogenic SMS2 variants support bulk production of SM in the ER**

1021 (a) HeLa SMS1/2 double KO ( $\Delta$ SMS1/2) cells transduced with doxycycline-inducible constructs  
1022 encoding FLAG-tagged SMS2, SMS2<sup>I62S</sup>, SMS2<sup>M64R</sup> or their enzyme-dead isoforms (D276A) were  
1023 grown for 16 h in the absence or presence of 1  $\mu$ g/ml doxycycline and then subjected to immunoblot  
1024 analysis using  $\alpha$ -SMS2 and  $\alpha$ -Na/K-ATPase antibodies. Wildtype HeLa cells served as control. (b)  
1025  $\Delta$ SMS1/2 cells transduced with doxycycline-inducible FLAG-tagged SMS2<sup>M64R</sup> were treated as in (a),  
1026 fixed, immunostained with  $\alpha$ -FLAG antibody (*green*), counterstained with DAPI (*blue*) and imaged by  
1027 conventional fluorescence microscopy. Scale bar, 10  $\mu$ m. (c) Cells treated as in (a) were metabolically  
1028 labelled with a clickable sphingosine analogue for 16 h, subjected to total lipid extraction, click reacted  
1029 with the fluorogenic dye 3-azido-7-hydroxycoumarin and analyzed by TLC. (d) SM species in total  
1030 lipid extracts of cells treated as in (a) were quantified by LC-MS/MS and expressed as mol% of total  
1031 phospholipid analyzed. Note that the rise in dihydroSM (dhSM, d18:0/16:0) in  $\Delta$ SMS1/2 cells  
1032 expressing SMS2<sup>I62S</sup> or SMS2<sup>M64R</sup> (SMS2\*) is likely due to competition between ER-resident ceramide  
1033 desaturase (DES1) and SMS2\* for dihydroceramide (dhCer, d18:0/16:0), which is synthesized *de*  
1034 *novo* by ceramide synthase (CerS) from dihydrosphingosine (dhSph).

1035

1036 **Fig. 3. Cells expressing pathogenic variant SMS2<sup>M64R</sup> accumulate SM in the ER**

1037 (a) Workflow for affinity purification of the ER from HeLa cells expressing wildtype or pathogenic  
1038 SMS2 variants. (b) HeLa wildtype (WT) or  $\Delta$ SMS1/2 cells transduced with empty vector (EV) or  
1039 doxycycline-inducible SMS2 or SMS2<sup>M64R</sup> were treated with doxycycline (1  $\mu$ g/ml, 16 h), lysed and  
1040 used to purify the ER as in (a). Whole cell lysates (WC) and purified ER were subjected to  
1041 immunoblot analysis using antibodies against SMS2 and various organellar markers. (c) Lipid  
1042 composition of whole cell lysates (WC) and ER purified from HeLa wildtype cells (WT) was  
1043 determined by mass spectrometry-based shotgun lipidomics. Levels of the different lipid classes are  
1044 expressed as mol% of total identified lipids. (d) Lipid composition of whole cell lysates (WC) and ER

1045 purified from cells as in (b) was determined as in (c). **(e)** Comparative analysis of PC unsaturation and  
1046 chain length in ER purified from  $\Delta$ SMS1/2 cells expressing SMS2 or SMS2<sup>M64R</sup>. The graphs show  
1047 total numbers of double bonds (*left*) or carbon atoms (*right*) in the two acyl chains. All data are  
1048 average  $\pm$  SD,  $n = 4$ . \* $p < 0.05$ , \*\* $p < 0.01$ , \*\*\* $p < 0.001$  by paired  $t$  test.

1049

1050 **Fig. 4. Lipid composition of the PM of cells expressing wildtype or pathogenic SMS2 variants**

1051 **(a)** Workflow for affinity purification of the PM from HeLa cells expressing wildtype or pathogenic  
1052 SMS2 variants. **(b)** HeLa wildtype (WT) or  $\Delta$ SMS1/2 cells transduced with empty vector (EV) or  
1053 doxycycline-inducible SMS2 or SMS2<sup>M64R</sup> were treated with doxycycline (1  $\mu$ g/ml, 16 h), lysed and  
1054 used to purify the PM as in (a). Whole cell lysates (WC) and purified PM were subjected to  
1055 immunoblot analysis using antibodies against SMS2 and various organellar markers. **(c)** Lipid  
1056 composition of whole cell lysates (WC) and PM purified from HeLa wildtype cells (WT) was  
1057 determined by mass spectrometry-based shotgun lipidomics. Levels of the different lipid classes are  
1058 expressed as mol% of total identified lipids. **(d)** Lipid composition of whole cell lysates (WC) and PM  
1059 purified from cells as in (b) was determined as in (c). All data are average  $\pm$  SD,  $n = 5$ .

1060

1061 **Fig. 5. Luminal SM reporter EqtSM<sub>ss</sub> enables visualization of an ER-resident SM pool in**  
1062 **SMS2<sup>M64R</sup>-expressing cells**

1063 **(a)** Human osteosarcoma U2OS cells co-transfected with mCherry-tagged VAPA (ER, *magenta*) and  
1064 empty vector (control), SMS2<sup>M64R</sup> or SMS2<sup>M64R/D276A</sup> and luminal GFP-tagged SM reporter EqtSM<sub>ss</sub> or  
1065 its SM binding-defective derivative, EqtSol<sub>ss</sub> (Eq<sub>t</sub>, *green*), were incubated in isotonic medium (100%  
1066 Optimem) for 5 min and imaged by spinning disc confocal microscopy. **(b)** Cells treated as in (a) were  
1067 incubated in hypotonic medium (1% Optimem) for 5 min and then imaged by spinning disc confocal  
1068 microscopy. Scale bar, 10  $\mu$ m.

1069

1070 **Fig. 6. Pathogenic SMS2 variants disrupt transbilayer SM asymmetry**

1071 **(a)** HeLa  $\Delta$ SMS1/2 cells transduced with doxycycline-inducible SMS2, SMS2<sup>M64R</sup>, SMS2<sup>I62S</sup> or their  
1072 enzyme-dead isoforms (D276A) were transfected with cytosolic GFP-tagged SM reporter EqtSM<sub>cyto</sub> or  
1073 its SM binding-defective derivative, EqtSol<sub>cyto</sub> (Eq<sub>t</sub>, *green*). After treatment with doxycycline (1  $\mu$ g/ml,  
1074 16 h), cells were fixed, immunostained with  $\alpha$ -calnexin antibodies (*magenta*), counterstained with  
1075 DAPI (*blue*) and imaged by DeltaVision microscopy. **(b)** HeLa  $\Delta$ SMS1/2 cells transduced with  
1076 doxycycline-inducible SMS2<sup>M64R</sup> were transfected with EqtSM<sub>cyto</sub> (*green*) and treated with doxycycline  
1077 as in (a). Next, cells were fixed, immunostained with antibodies against various organellar markers  
1078 (*magenta*), counterstained with DAPI (*blue*) and imaged by DeltaVision microscopy. The ER was  
1079 marked by co-transfection with mCherry-tagged VAPA while lipid droplets were labeled using the  
1080 lipophilic dye LD540. Scale bar, 10  $\mu$ m.

1081

1082

1083 **Fig. 7. SMS2<sup>M64R</sup>-expressing cells fail to concentrate SM on their surface and exhibit**  
1084 **imbalances in lipid order**

1085 (a) HeLa wildtype (WT) or  $\Delta$ SMS1/2 cells transduced with doxycycline-inducible SMS2, SMS2<sup>M64R</sup> or  
1086 their enzyme-dead isoforms (D276A) were treated with doxycycline (1  $\mu$ g/ml, 16 h), incubated with  
1087 FLAG-tagged EqtSM, fixed, co-stained with  $\alpha$ -FLAG antibody (*green*) and DAPI (*blue*), and imaged by  
1088 DeltaVision microscopy. (b) Cells treated as in (a) were analyzed by flow cytometry to quantitatively  
1089 assess EqtSM labeling of their surface. (c) Cells treated as in (a) were stained with 0.2  $\mu$ M NR12A for  
1090 10 min and analyzed by ratiometric fluorescence microscopy to probe the lipid order in the outer PM  
1091 leaflet. Warmer colors reflect a higher lipid order. (d) Quantitative assessment of changes in lipid  
1092 order in the outer PM leaflet of cells treated as in (c).  $n = 30$  cells per condition over two independent  
1093 experiments. (e) Cells treated as in (a) were stained with 0.2  $\mu$ M NRER<sub>Cl</sub> for 10 min and analyzed by  
1094 ratiometric fluorescence microscopy to probe lipid order in the ER. Warmer colors reflect a higher lipid  
1095 order. (f) Quantitative assessment of changes in lipid order in the ER of cells treated as in (e).  $n = 30$   
1096 cells per condition over two independent experiments. All  $p$  values calculated by unpaired  $t$ -test. Scale  
1097 bar, 10  $\mu$ m.

1098

1099 **Fig. 8. Pathogenic SMS2 variants perturb subcellular cholesterol pools**

1100 (a) HeLa  $\Delta$ SMS1/2 cells transduced with doxycycline-inducible SMS2, SMS2<sup>M64R</sup> or SMS2<sup>I62S</sup> were co-  
1101 transfected with GFP-tagged EqtSM<sub>cyto</sub> (*green*) and mCherry-tagged cytosolic sterol reporter D4H  
1102 (*red*). Next, cells were treated with 1  $\mu$ g/ml doxycycline for 16 h, fixed, counterstained with DAPI  
1103 (*blue*) and visualized by DeltaVision microscopy. (b) HeLa  $\Delta$ SMS1/2 cells stably transduced with  
1104 FLAG-tagged SMS2 or SMS2<sup>M64R</sup> were transfected with mCherry-tagged D4H (*red*), labeled with  
1105 fluorescein-conjugated dextran (*green*) in the presence of 1  $\mu$ g/ml doxycycline for 16 h and then  
1106 imaged by spinning disc confocal microscopy. (c) HeLa wildtype (WT) or  $\Delta$ SMS1/2 cells stably  
1107 transduced with SMS2, SMS2<sup>M64R</sup> or SMS2<sup>I62S</sup> were treated with 1  $\mu$ g/ml doxycycline for 16 h. Next,  
1108 cells were exposed to the indicated concentration of methyl  $\beta$ -cyclodextrin (m $\beta$ CD) for 1 h and cell  
1109 viability was assessed using Prestobluereagent. Data shown are averages of 4 technical replicates  
1110 from  $n = 3$  biological replicates. \* $p < 0.05$ , \*\* $p < 0.01$ , \*\*\* $p < 0.001$  by paired  $t$  test. Scale bar, 10  $\mu$ m.

1111

1112 **Fig. 9. Patient-derived fibroblasts display perturbations in SM distribution and lipid order**

1113 (a) Control (WT) or patient-derived human skin fibroblasts carrying heterozygous missense variants  
1114 c.185T>G (p.I62S) or c.191T>G (p.M64R) in *SGMS2* were co-transfected with mCherry-tagged VAPA  
1115 (ER, *magenta*) and GFP-tagged EqtSM<sub>ss</sub> (*green*). Co-transfections with GFP-tagged EqtSol<sub>ss</sub> served  
1116 as control. After 16 h, cells were incubated in hypotonic medium (1% Optimem) for 5 min and imaged  
1117 by spinning disc confocal microscopy. (b) Fibroblasts as in (a) were transfected with GFP-tagged  
1118 EqtSM<sub>cyto</sub>. After 16 h, cells were fixed, immunostained with  $\alpha$ -calnexin antibodies (ER, *magenta*),  
1119 counterstained with DAPI (*blue*) and imaged by DeltaVision microscopy. (c) Fibroblasts as in (a) were  
1120 stained with 0.2  $\mu$ M NR12A for 10 min and analyzed by ratiometric fluorescence microscopy to  
1121 quantitatively assess lipid order in the outer PM leaflet. Warmer colors reflect a higher lipid order.  $n =$   
1122 30 cells per condition analyzed over two independent experiments. (d) Fibroblasts as in (a) were

1123 stained with 0.2  $\mu\text{M}$  NRER<sub>cl</sub> for 10 min and analyzed by ratiometric fluorescence microscopy to  
1124 quantitatively assess lipid order in the ER. Warmer colors reflect a higher lipid order.  $n = 27$  cells per  
1125 condition analyzed over two independent experiments. All  $p$  values calculated by unpaired  $t$ -test.  
1126 Scale bar, 10  $\mu\text{m}$ .

Fig. 1. Sokoya, Parolek *et al.*

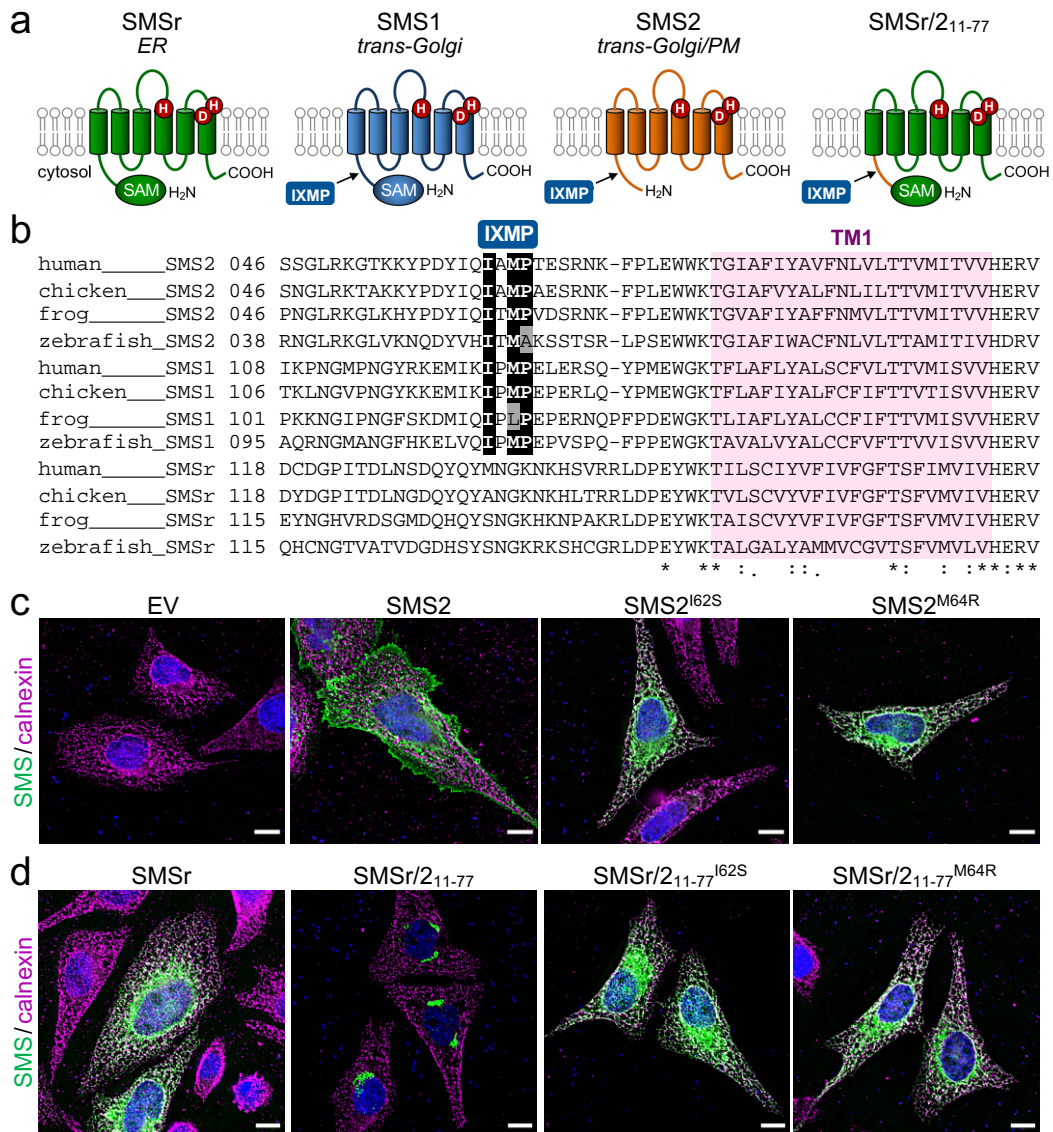

Fig. 2. Sokoya, Parolek *et al.*

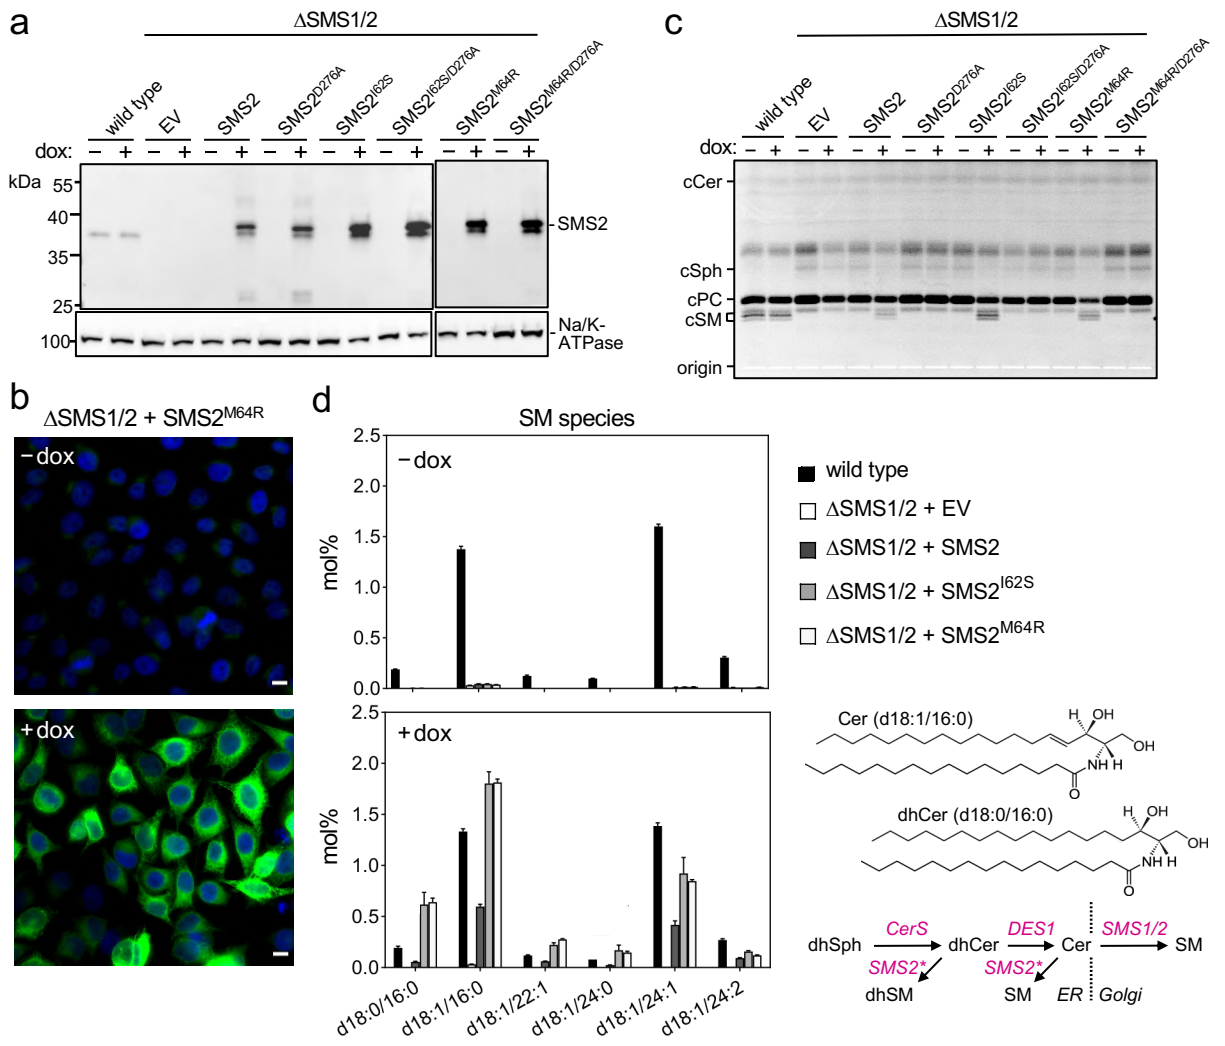





Fig. 4. Sokoya, Parolek *et al.*

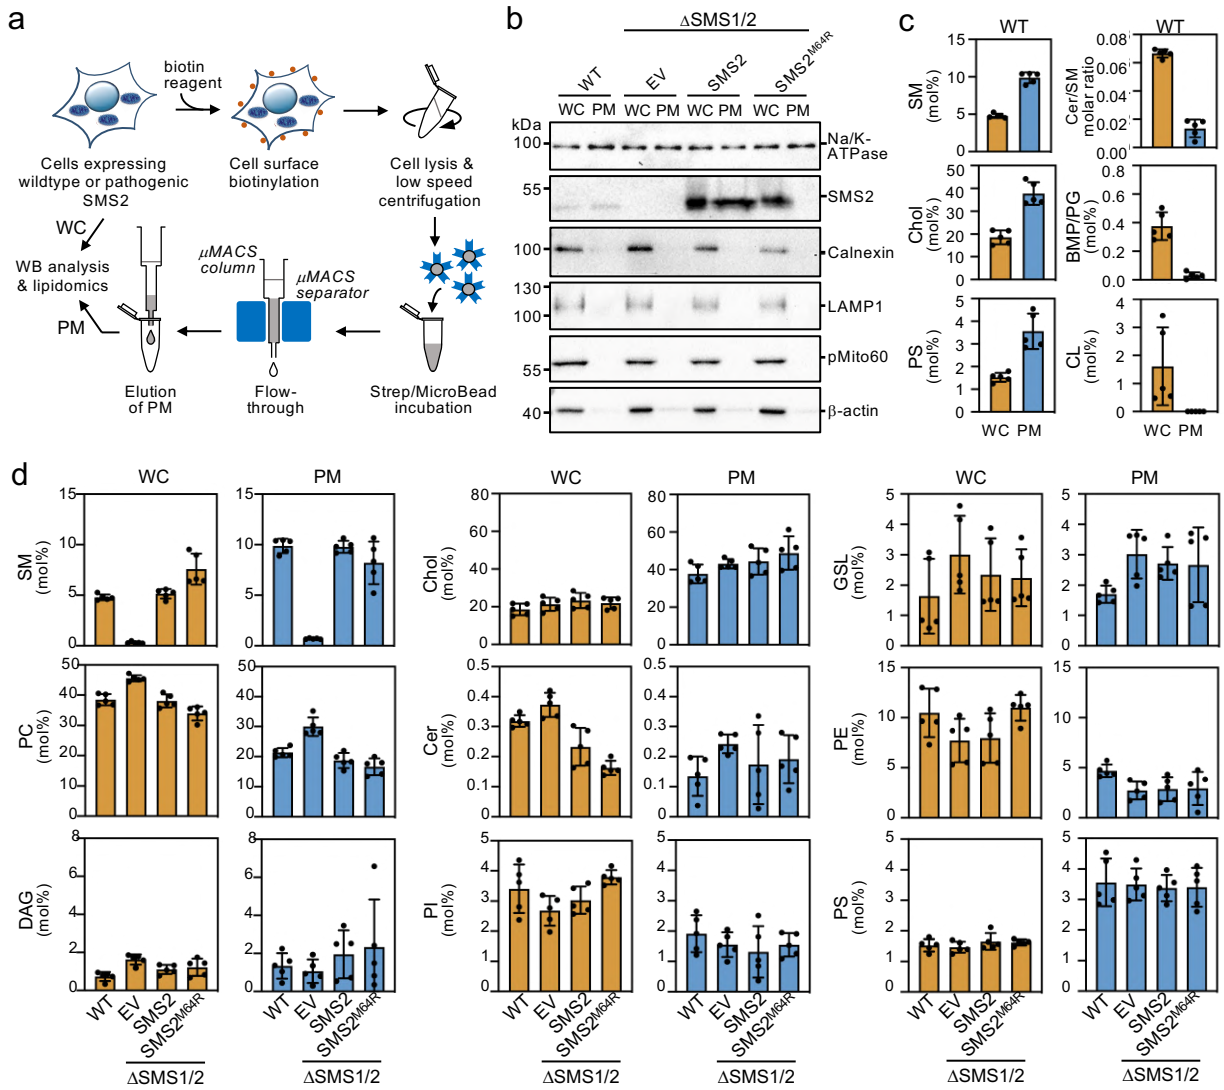

Fig. 5. Sokoya, Parolek *et al.*

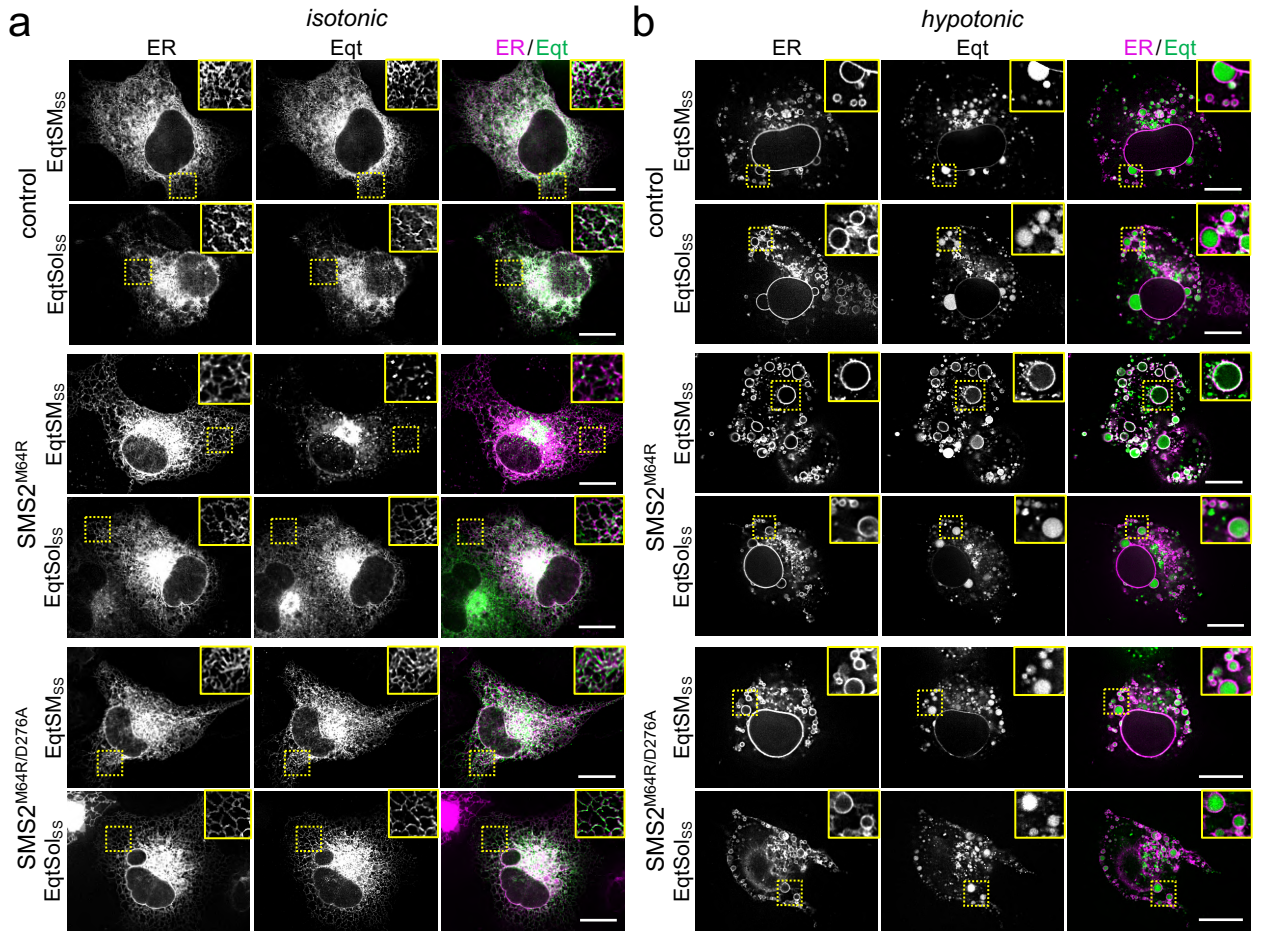

Fig. 6. Sokoya, Parolek *et al.*

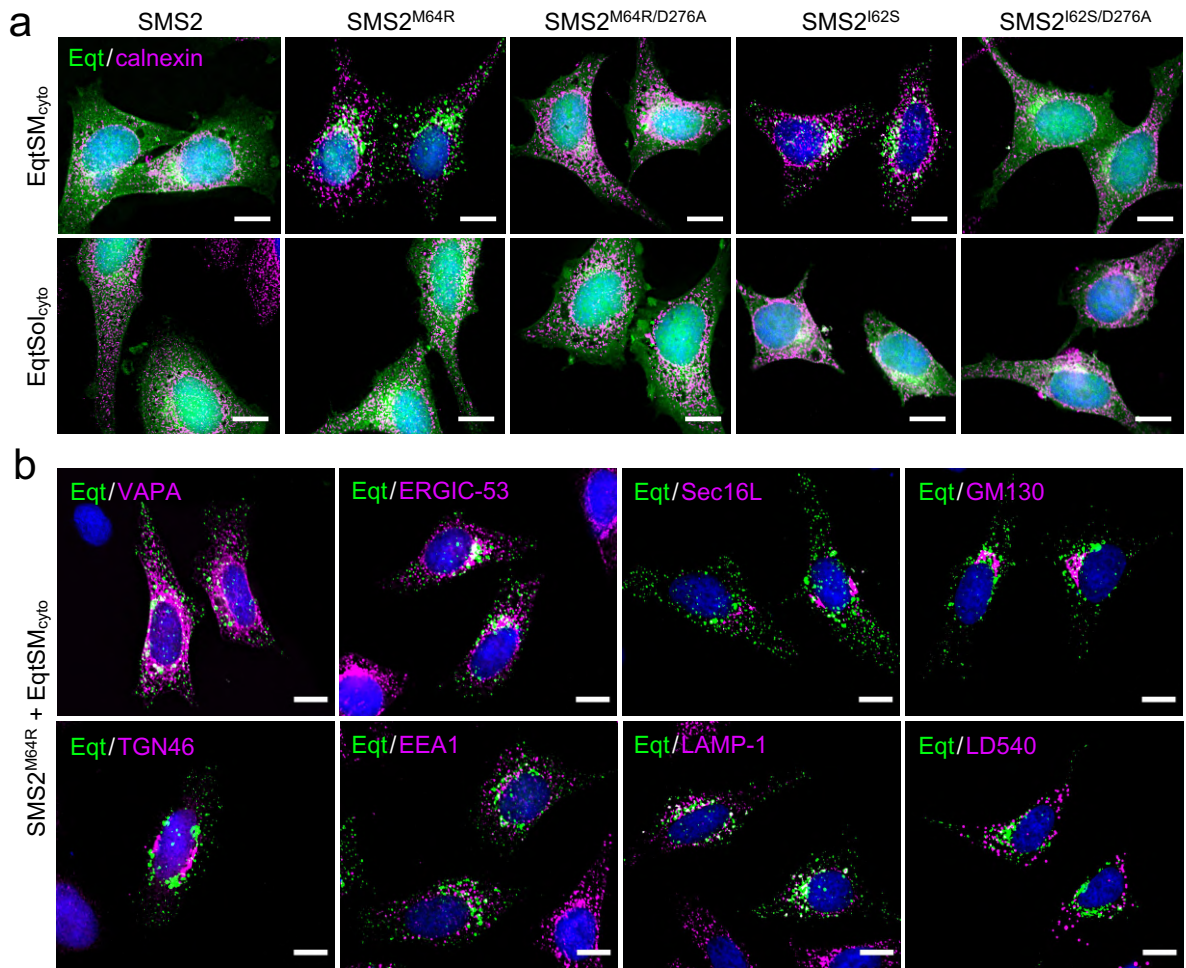

Fig. 7. Sokoya, Parolek *et al.*

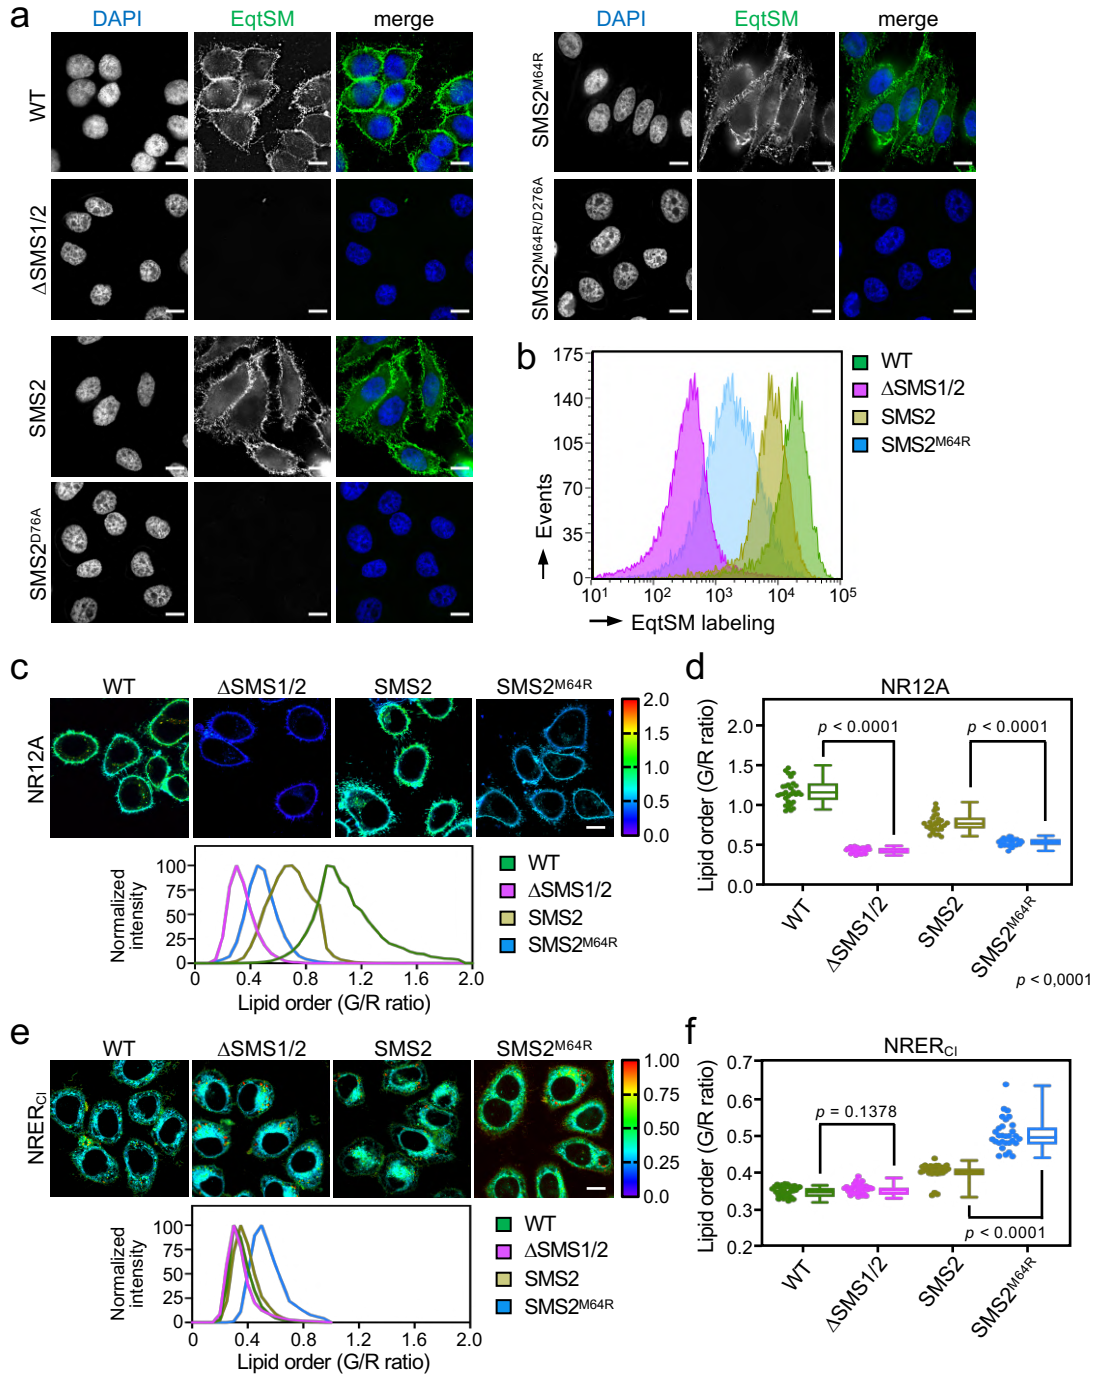

Fig. 8. Sokoya, Parolek *et al.*

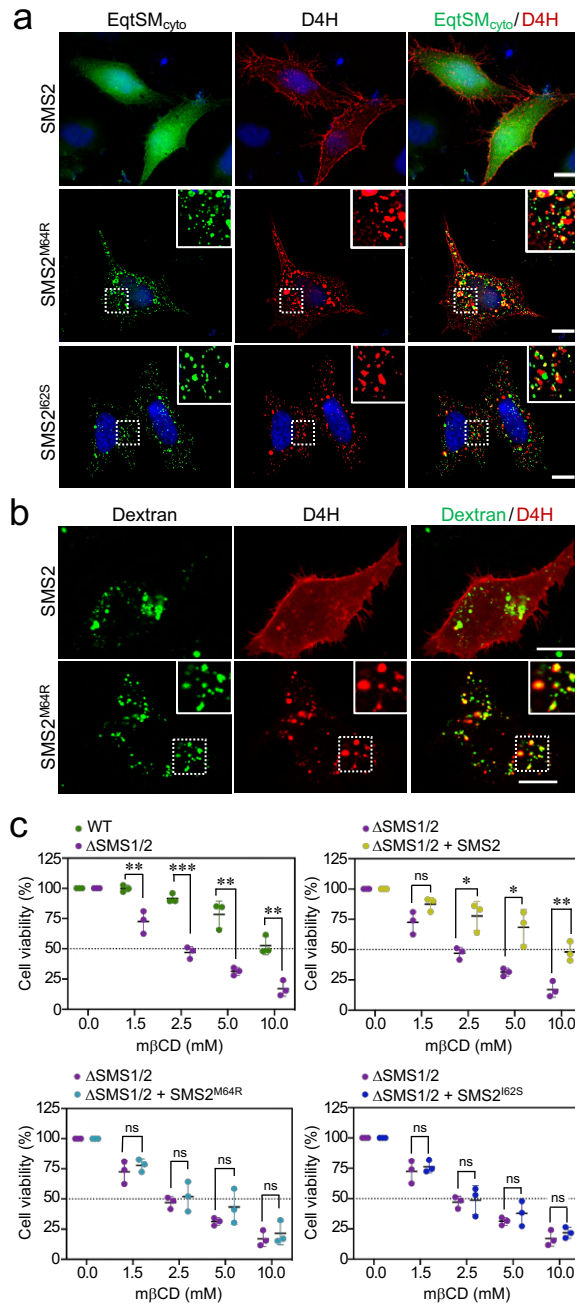

Source: https://www.biorxiv.org/content/10.1101/2022.04.02.486804v1.full.pdf
